# 1 Alternative stable states, nonlinear behavior, and 2 predictability of microbiome dynamics

3

4 Hiroaki Fujita<sup>1\*</sup>, Masayuki Ushio<sup>1,2</sup>, Kenta Suzuki<sup>3</sup>, Masato S. Abe<sup>4</sup>, Masato Yamamichi<sup>5,6</sup>,  
5 Koji Iwayama<sup>7</sup>, Alberto Canarini<sup>1</sup>, Ibuki Hayashi<sup>1</sup>, Keitaro Fukushima<sup>8</sup>, Shinji Fukuda<sup>9,10,11</sup>,  
6 E. Toby Kiers<sup>12</sup>, and Hirokazu Toju<sup>1\*</sup>

7

8 <sup>1</sup>Center for Ecological Research, Kyoto University, Otsu, Shiga 520-2133, Japan

9 <sup>2</sup>Hakubi Center, Kyoto University, Kyoto 606-8501, Japan

10 <sup>3</sup>Integrated Bioresource Information Division, BioResource Research Center, RIKEN,  
11 Tsukuba, Ibaraki 305-0074, Japan

12 <sup>4</sup>Center for Advanced Intelligence Project, RIKEN, Tokyo 103-0027, Japan

13 <sup>5</sup>School of Biological Sciences, The University of Queensland, St. Lucia, Brisbane, QLD  
14 4072, Australia

15 <sup>6</sup>Department of International Health and Medical Anthropology, Institute of Tropical  
16 Medicine, Nagasaki University, Nagasaki 852-8523, Japan

17 <sup>7</sup>Faculty of Data Science, Shiga University, Hikone 522-8522, Japan

18 <sup>8</sup>Faculty of Food and Agricultural Sciences, Fukushima University, Kanayagawa 1,  
19 Fukushima, Fukushima 960-1296, Japan.

20 <sup>9</sup>Institute for Advanced Biosciences, Keio University, Tsuruoka, Yamagata 997-0052, Japan.

21 <sup>10</sup>Gut Environmental Design Group, Kanagawa Institute of Industrial Science and  
22 Technology, Kawasaki, Kanagawa 210-0821, Japan.

23 <sup>11</sup>Transborder Medical Research Center, University of Tsukuba, Tsukuba, Ibaraki 305-8575,  
24 Japan.

25 <sup>12</sup>Department of Ecological Science, Vrije Universiteit Amsterdam, Amsterdam, the  
26 Netherlands

27

28 Correspondence and requests for materials should be addressed to H.F. (email:  
29 [fujita.h@ecology.kyoto-u.ac.jp](mailto:fujita.h@ecology.kyoto-u.ac.jp)) or H.T. (email: [toju.hirokazu.4c@kyoto-u.ac.jp](mailto:toju.hirokazu.4c@kyoto-u.ac.jp)).

30

31 This article includes 6 Figures, and 10 Extended Data Figures.

32

### 33 **Abstract**

34 Microbiome dynamics are both crucial indicators and drivers of human health, agricultural  
35 output, and industrial bio-applications. However, predicting microbiome dynamics is  
36 notoriously difficult because communities often show abrupt structural changes, such as  
37 “dysbiosis” in human microbiomes. We here integrate theoretical and empirical bases for  
38 anticipating drastic shifts of microbial communities. We monitored 48 experimental  
39 microbiomes for 110 days and observed that various community-level events, including  
40 collapse and gradual compositional changes, occurred according to a defined set of  
41 environmental conditions. We then confirmed that the abrupt community changes observed  
42 through the time-series could be described as shifts between “alternative stable states” or  
43 dynamics around complex attractors. Furthermore, collapses of microbiome structure were  
44 successfully anticipated by means of the diagnostic threshold defined with the energy  
45 landscape analysis of statistical physics or that of a stability index of nonlinear mechanics.  
46 These results indicate that abrupt microbiome events in complex microbial communities can  
47 be forecasted by extending classic ecological concepts to the scale of species-rich microbial  
48 systems.

49

50 Optimizing biological functions of species-rich systems is a major challenge in both basic and  
51 applied sciences<sup>1-7</sup>. Managing the compositions of human gut microbiomes, for example, is  
52 essential for preventing diabetes<sup>8,9</sup>, infectious disease<sup>10</sup>, and neuropsychiatric disorders<sup>11</sup>.  
53 Likewise, soil and plant-associated microbiomes drive nutrient cycling and pest/pathogen  
54 outbreaks in agroecosystems<sup>5,6</sup>, while highly controlled microbiomes facilitate stable and

55 resource-efficient management in biofuel production<sup>7</sup> and water purification<sup>12</sup>. Nonetheless, it  
56 remains generally difficult to control microbial ecosystem functions because species-rich  
57 microbial communities often show drastic structural (compositional) changes<sup>13,14</sup>. Thus,  
58 predicting such community-scale events remains an essential task.

59 Drastic changes in biological community structure have been theoretically framed as  
60 transient dynamics towards a global equilibrium<sup>15,16</sup>, shifts between alternative equilibria<sup>16,17</sup>,  
61 or dynamics around complex forms of attractors<sup>18–20</sup>. Within a state space with a sole  
62 equilibrium point, drastic community compositional changes may be observed in the course  
63 of convergence to the global equilibrium<sup>15</sup>. In contrast, if multiple equilibria exist within a  
64 state space, abrupt community changes can be described as shifts between alternative stable  
65 states<sup>17</sup>. In other words, fluctuations in population densities of constituent species (variables)  
66 or changes in environments (parameters) can cause shifts of community states from a stable  
67 state to the other ones<sup>16,17</sup>. Meanwhile, drastic community changes may be depicted as well in  
68 terms of dynamics around periodic/quasi-periodic attractors (i.e., limit cycle or torus) or  
69 dynamics around attractors with non-integer dimensions<sup>18,21–23</sup> (i.e., chaos).

70 In analyzing empirical time-series data of microbiome structure, these concepts of  
71 community dynamics are implemented with two lines of frameworks (Fig. 1a). One is the  
72 framework of energy landscape analyses in statistical physics<sup>24–26</sup>, in which  
73 stability/instability of possible community states (compositions) are evaluated in the metric of  
74 “energy”. In energy landscape analyses, stable states within a state space are defined as  
75 community compositions whose energy values are lower than those of adjacent community  
76 compositions<sup>24</sup>. Thus, based on the reconstruction of energy landscapes, large community  
77 compositional changes are interpreted as transient dynamics towards an equilibrium or shifts  
78 between alternative equilibria (Fig. 1a). The other framework for describing abrupt  
79 community changes is based on nonlinear mechanics, which allows us to assume the presence  
80 of complex forms of attractors<sup>19,20,22,27</sup>. The framework of empirical reconstruction of  
81 attractors (“empirical dynamics modeling<sup>28,29</sup>”), in particular, provides a platform for  
82 interpreting community dynamics as deterministic processes around any forms of attractors  
83 (Fig. 1a). The two frameworks are potentially useful for framing microbial community  
84 processes. Nonetheless, it remains to be examined whether drastic changes in microbiome  
85 dynamics, such as dysbiosis in human-associated microbiomes<sup>14,30,31</sup>, could be predicted with  
86 either or both of the frameworks.

87 The major constraint preventing the comparison of the two frameworks is the lack of

88 empirical datasets that simultaneously meet the basic requirements of energy landscape  
89 analyses and empirical dynamic modeling. Therefore, by developing a monitoring system of  
90 experimental microbiomes, we compile a series of microbiome time-series data with  
91 substantial community-compositional changes. By implementing an energy landscape  
92 analysis and empirical dynamic modeling, we examine whether the substantial community  
93 changes could be anticipated as transient dynamics towards global equilibria, shifts between  
94 stable states, or dynamics around complex attractors. Based on the results, we discuss how we  
95 can integrate empirical and theoretical studies for predicting and controlling species-rich  
96 microbial systems.

97

## 98 **Results**

### 99 **Experimental microbiome dynamics**

100 To obtain time-series datasets of diverse microbiome dynamics, we constructed six types of  
101 microbiomes based on the combinations of two inoculum sources (soil and pond water  
102 microbiomes; hereafter, Soil and Water) and three media differing in chemical properties  
103 (oatmeal, oatmeal-peptone, and peptone; hereafter, Medium-A, B, and C, respectively), each  
104 with eight replicates (Extended Data Fig. 1). We kept the experimental system at a constant  
105 temperature condition and sampled a fraction of each microbiome and added fresh media  
106 every 24 hours for 110 days. For each of the six experimental treatment, 880 community  
107 samples were obtained (in total, 110 time points  $\times$  8 replicates  $\times$  6 treatments = 5,280  
108 community samples), providing rich information for exploring stable states of community  
109 structure by means of energy landscape analyses. In total, the dataset represented population  
110 dynamics of 264 prokaryote amplicon sequence variants (ASVs) belonging to 108 genera.  
111 Using quantitative amplicon sequencing<sup>32</sup> for estimating 16S ribosomal RNA gene (16S  
112 rRNA) copy concentrations of respective microbes in each microbiome, we determined the  
113 dynamics of both “relative” and “absolute” ASV abundance (Fig. 1b; Extended Data Figs. 1-  
114 3). By estimating not only relative but also absolute abundance, we were able to reconstruct  
115 respective ASVs’ population dynamics (increase/decrease), satisfying the requirements for  
116 applying empirical dynamic modeling<sup>19,20,22</sup>.

117 The experimental microbiomes exhibited various types of dynamics depending on  
118 source inocula and culture media (Fig. 1b; Extended Data Figs. 2-3). Specifically, sharp  
119 decline of taxonomic diversity<sup>33</sup> and abrupt (sudden and substantial) community structural

120 changes (see “abruptness” index in Fig. 1b) were observed in Water/Medium-A,  
121 Soil/Medium-A, and Water/Medium-B treatments (abruptness > 0.5). Within these treatments,  
122 taxonomic compositions and timing of abrupt shifts in community structure varied among  
123 replicate communities (Extended Data Fig. 3). Large shifts of community compositions  
124 through time were observed as well in Soil/Medium-B treatment, albeit the community shifts  
125 were more gradual (maximum abruptness through time-series, 0.36 ~ 0.57; Extended Data  
126 Fig. 3). In contrast, Medium-C condition yielded relatively steady microbiome dynamics with  
127 continuously low taxonomic diversity (e.g., dominance of *Aeromonas* in Water/Medium-C  
128 treatment), although shifts of dominant taxa were observed latter in the experiment in some  
129 replicate communities (Extended Data Fig. 3). In all the six treatments, the  $\alpha$ -diversity  
130 (Shannon diversity) of ASVs displayed fluctuations, but not monotonic decrease, through  
131 time (Extended Data Fig. 1e).

132

### 133 **Framework 1: energy landscape analysis**

134 By compiling the microbiome time-series data, we examined the distributions of stable states  
135 within the multidimensional space of community structure based on an energy landscape  
136 analysis<sup>24</sup>. Because no variation in environmental conditions was introduced through the  
137 time-series in our experiment, a fixed “energy landscape” of community states was assumed  
138 for each of the six treatments. On this assumption, shifts between alternative stable states are  
139 attributed to perturbations to variables (i.e., population density of microbial ASVs) but not to  
140 “regime shifts<sup>34–36</sup>”, which, by definition, requires energy landscape reorganization caused by  
141 changes in environmental parameters (i.e., temperature).

142 In each experimental treatment, multiple stable states were estimated to exist (Fig. 2;  
143 Extended Data Fig. 4), indicating that the observed abrupt changes in community  
144 compositions could be described as shifts between alternative stable states. Therefore, in this  
145 approach of statistical physics<sup>24–26</sup>, community dynamics are divided into phases of  
146 fluctuations around local equilibrium points and those of shifts into adjacent equilibria. In  
147 other words, the presence of multiple equilibrium points (Extended Data Fig. 4), by  
148 definition, means that the observed dynamics of the experimental microbiomes are not  
149 described as transient dynamics towards a sole equilibrium point.

150

### 151 **Framework 2: empirical dynamic modeling**

152 We next analyzed the time-series data based on the framework of empirical dynamic  
153 modeling. We first focused on the population dynamics (increase/decrease) of the microbial  
154 ASVs constituting the microbial communities. In ecology, population dynamics data have  
155 often been analyzed with methods assuming linear dynamics (i.e., without considering “state  
156 dependency<sup>37</sup>”). Meanwhile, a series of empirical dynamics modeling approaches applicable  
157 to nonlinear time-series processes, such as simplex projection<sup>20</sup> and sequential locally  
158 weighted global linear maps<sup>19</sup> (S-map), have been increasingly adopted to capture key  
159 properties lost with linear dynamic assumptions (Fig. 3a). We found that ca. 85 % of the  
160 microbial populations in our experiments exhibited nonlinear behavior (i.e., nonlinearity  
161 parameter  $\theta > 0$ ; Fig. 3b). This result suggests the predominance of nonlinear dynamics over  
162 linear dynamics in microbial populations<sup>32</sup>, in line with populations of other organismal  
163 groups such as fish<sup>38</sup> and plankton<sup>21</sup>.

164 We then reconstructed the attractors of nonlinear dynamics based on Takens’ embedding  
165 theorem<sup>39</sup> (Fig. 3a). To examine the performance of the attractor reconstruction, we conducted  
166 forecasting of the population dynamics of respective microbial ASVs by means of simplex  
167 projection and S-map (Fig. 3c). The population density (16S rRNA copy concentration) of an  
168 ASV in a target replicate community at time point  $t + p$  ( $p$  represents time steps in  
169 forecasting) was forecasted based on the ASV’s population density at time point  $t$  and time-  
170 series data of other replicate communities (hereafter, reference replicate communities; see  
171 Methods for details; Fig. 3a). For many microbial ASVs, predicted population densities was  
172 positively correlated with observed ones (Fig. 3c-d; Extended Data Fig. 5). As expected,  
173 correlation between predicted and observed population size increased with increasing number  
174 of reference replicate communities, suggesting dependence of forecasting skill on the size of  
175 state-space reference databases (Extended Data Fig. 6).

176 By assembling the forecasting results of respective ASVs at the community level, we  
177 further conducted forecasting of microbiome compositions (Fig. 4a; Extended Data Fig. 7).  
178 The forecasting precision of community-level dynamics varied depending on culture media  
179 and the dissimilarity ( $\beta$ -diversity) of community structure between target and reference  
180 replicates (Fig. 4b). Despite the utility of the forecasting platform, we observed high  
181 prediction error immediately after the peak of abrupt community changes (Fig. 4c; Extended  
182 Data Fig. 8). Although the nonlinear method (S-map with optimized  $\theta$ ) captured the observed  
183 abrupt shifts of community compositions within a narrower time window than the linear  
184 method (S-map with  $\theta = 0$ ) (Fig. 4c), quantitative forecasting of abrupt community changes

185 seemed inherently difficult.

186         Nonetheless, even if precise forecasting of community compositional dynamics remains  
187 challenging, prediction of the occurrence of abrupt community changes *per se* may be  
188 possible. Thus, we next examined whether potential of abrupt community changes could be  
189 evaluated through microbiome dynamics.

190

### 191 **Anticipating abrupt community shifts**

192 Based on the frameworks of the energy landscape analysis and empirical dynamic modeling,  
193 we explored ways for anticipating abrupt events in community dynamics. In the former  
194 framework roach, the reconstructed energy landscapes were used to estimate “energy gap”  
195 and “stable-state entropy” indices, which represented stability/instability of community  
196 states<sup>24</sup> (Fig. 5a). In the latter framework, the inferred Jacobian matrices of the multi-species  
197 time-series dynamics (see Methods) were used to calculate “local Lyapunov stability<sup>40</sup>” and  
198 “local structural stability<sup>41</sup>”. We examined how these indices could help us forecast large  
199 community-compositional shifts such as those observed in Medium-A and Medium-B  
200 treatments (Fig. 1b).

201         Among the signal indices examined, energy gap or stable-state entropy of community  
202 states (Fig. 5a) was significantly correlated with the degree of future community changes in  
203 Medium-A and Medium-B treatments (FDR < 0.05 for all treatments; Fig. 5b; Extended Data  
204 Fig. 9). In the seven-day-ahead forecasting of abrupt community-compositional changes  
205 (abruptness > 0.5), for example, stable-state entropy showed relatively high diagnostic  
206 performance on the two-dimensional surface of detection rate (sensitivity) and false detection  
207 rate (1 – specificity) as represented by receiver operating characteristic (ROC) curve<sup>42</sup>.  
208 Specifically, although the small number of points with abruptness greater than 0.5 (Extended  
209 Data Fig. 10) precluded the application of the ROC analysis in Soil/Medium-B treatment,  
210 diagnostic performance as evaluated by area under the ROC curve (AUC) ranged from 0.726  
211 to 0.957 in other Medium-A and Medium-B treatments (Fig. 6a).

212         Local Lyapunov or structural stability was correlated with the degree of community  
213 changes as well, but the correlations were less consistent among experimental treatments than  
214 energy gap and stable-state entropy (Fig. 5b; Extended Data Fig. 9). Meanwhile, local  
215 structural stability exhibited exceptionally high diagnostic performance in Water/Medium-A  
216 treatment (AUC = 0.788; Fig. 6a; Extended Data Fig. 10). Thus, local Lyapunov or structural

217 stability can be used as signs of future microbiome collapse, although further technical  
218 improvement in the state space reconstruction of species-rich communities (e.g., multi-view  
219 distance regularized S-map<sup>43</sup>) may be needed to gain consistent forecasting performance  
220 across various types of microbiomes.

221 By further utilizing the frameworks of the energy landscape analysis and empirical  
222 dynamic modeling, we next examined the availability of diagnostic thresholds for anticipating  
223 community collapse. For this aim, we first focused on stable-state entropy because its  
224 absolute values in the unit of well-known entropy index (Fig. 5a) were comparable across  
225 diverse types of biological communities. Based on the ROC curve representing all the stable-  
226 state entropy data of Medium-A and Medium-B treatments, the balance between detection and  
227 false-detection rates were optimized with the Youden index<sup>42</sup>. With a relatively high AUC  
228 score (0.848), the threshold stable-state entropy was set as 1.343 (Fig. 6b). In the same way,  
229 we calculated the threshold value for local Lyapunov stability because this index originally  
230 had a tipping value (= 1) for diagnosing community-level stability/instability<sup>40</sup>. Indeed, the  
231 estimated threshold of local Lyapunov stability on the ROC curve was 0.9802, close to the  
232 theoretically expected value (Fig. 6b).

233

## 234 **Discussion**

235 By compiling datasets of experimental microbiome dynamics under various environmental  
236 (medium) conditions, we here tested whether two lines of ecological concepts could allow us  
237 to anticipate drastic compositional changes in microbial communities. Despite decades-long  
238 discussion on alternative stable/transient states of community structure<sup>15–17,35,36</sup>, the  
239 application of the concept to empirical data of species-rich communities has been made  
240 feasible only recently with the computationally intensive approach of statistical physics  
241 (energy landscape analyses<sup>24</sup>). On the other hand, the concept of dynamics around complex  
242 forms of attractors has been applicable with the emerging framework of nonlinear  
243 mechanics<sup>27,40,41</sup> (e.g., empirical dynamic modeling), microbiome time-series data satisfying  
244 the requirements of the analytical frameworks remained scarce<sup>32</sup>. Thus, this study, which was  
245 designed to apply both frameworks, provided a novel opportunity for fuel feedback between  
246 empirical studies of species-rich communities and theoretical studies based on  
247 classic/emerging ecological concepts.

248 Our analysis showed drastic events in microbiome dynamics, such as those observed in



249 dysbiosis of human-gut microbiomes<sup>13,14</sup>, could be forecasted, at least to some extent, by  
250 framing microbiome time-series data as shifts between alternative stable states or dynamics  
251 around complex attractors. In the forecasting of abrupt community changes observed in our  
252 experimental microbiomes, the former concept (model) seemingly outperformed the latter  
253 (Figs. 5-6). This result is of particular interest, because concepts or models more efficiently  
254 capturing dynamics of empirical data are expected to provide more plausible planforms in not  
255 only prediction but also control of biological community processes. Nonetheless, given the  
256 ongoing methodological improvements of nonlinear mechanics frameworks for describing  
257 empirical time-series data<sup>43</sup>, further empirical studies comparing the two concepts are  
258 necessary.

259 A key next step for forecasting and controlling microbial (and non-microbial)  
260 community dynamics is to examine whether common diagnostic thresholds could be used to  
261 anticipate collapse of community structure. This study provided the first empirical example  
262 that the tipping value theoretically defined in noncolinear mechanics<sup>40</sup> (local Lyapunov  
263 stability = 1) could be actually used as a threshold for alerting microbiome collapse.  
264 Likewise, although estimates of diagnostic thresholds can vary depending on the definition of  
265 community collapse (e.g., abruptness > 0.5 in this study), stable-state entropy scores greater  
266 than 1.3 can be used to anticipate undesirable community events (dysbiosis) across medical,  
267 agricultural, and industrial applications.

268 Given that changes in environmental parameters were not incorporated into our  
269 experimental design, it remains another important challenge to reveal how distributions of  
270 stable states or forms of attractors are continually reshaped by changes in environmental  
271 parameters through community dynamics<sup>17,34,35</sup>. Experimental manipulation of “external”  
272 environmental parameters in microcosms, for example, will expand the target of research into  
273 microbiome systems potentially driven by regime shifts<sup>34-36</sup>. Likewise, environmental  
274 alternations caused by organisms *per se*<sup>44-46</sup> deserve further investigations as potential drivers  
275 of drastic community shifts.

276 Controlling biological functions at the ecosystem level is one of the major scientific  
277 challenges in the 21<sup>st</sup> century<sup>5,47,48</sup>. Interdisciplinary approaches that further integrate  
278 microbiology, ecology, and mathematics are becoming indispensable for maximizing and  
279 stabilizing microbiome-level functions, and for providing novel solutions to a broad range of  
280 humanity issues spanning from human health to sustainable industry and food production.

281

## 282 **References**

- 283 1. Costello, E. K., Stagaman, K., Dethlefsen, L., Bohannan, B. J. M. & Relman, D. A. The  
284 application of ecological theory toward an understanding of the human microbiome.  
285 *Science (1979)* **336**, 1255–1262 (2012).
- 286 2. Cho, I. & Blaser, M. J. The human microbiome: At the interface of health and disease.  
287 *Nature Reviews Genetics* **13**, 260–270 (2012).
- 288 3. Huttenhower, C. *et al.* Structure, function and diversity of the healthy human  
289 microbiome. *Nature* **486**, 207–214 (2012).
- 290 4. Wu, G. D. *et al.* Linking long-term dietary patterns with gut microbial enterotypes.  
291 *Science (1979)* **334**, 105–108 (2011).
- 292 5. Toju, H. *et al.* Core microbiomes for sustainable agroecosystems. *Nature Plants* **4**,  
293 247–257 (2018).
- 294 6. Busby, P. E. *et al.* Research priorities for harnessing plant microbiomes in sustainable  
295 agriculture. *PLoS Biology* **15**, e2001793 (2017).
- 296 7. Kazamia, E., Aldridge, D. C. & Smith, A. G. Synthetic ecology - A way forward for  
297 sustainable algal biofuel production? *Journal of Biotechnology* **162**, 163–169 (2012).
- 298 8. Vatanen, T. *et al.* The human gut microbiome in early-onset type 1 diabetes from the  
299 TEDDY study. *Nature* **562**, 589–594 (2018).
- 300 9. Zhao, L. *et al.* Gut bacteria selectively promoted by dietary fibers alleviate type 2  
301 diabetes. *Science (1979)* **359**, 1151–1156 (2018).
- 302 10. Kim, Y.-G. *et al.* Neonatal acquisition of *Clostridia* species protects against  
303 colonization by bacterial pathogens. *Science (1979)* **356**, 315–319 (2017).
- 304 11. Chu, C. *et al.* The microbiota regulate neuronal function and fear extinction learning.  
305 *Nature* **574**, 543–548 (2019).
- 306 12. Sato, Y. *et al.* Transcriptome analysis of activated sludge microbiomes reveals an  
307 unexpected role of minority nitrifiers in carbon metabolism. *Communications Biology*  
308 **2**, 179 (2019).

- 309 13. Carding, S., Verbeke, K., Vipond, D. T., Corfe, B. M. & Owen, L. J. Dysbiosis of the  
310 gut microbiota in disease. *Microbial Ecology in Health & Disease* **26**, 26191 (2015).
- 311 14. Ravel, J. *et al.* Daily temporal dynamics of vaginal microbiota before, during and after  
312 episodes of bacterial vaginosis. *Microbiome* **1**, 29 (2013).
- 313 15. Hastings, A. *et al.* Transient phenomena in ecology. *Science (1979)* **361**, (2018).
- 314 16. Fukami, T. Historical contingency in community assembly: integrating niches, species  
315 pools, and priority effects. *Annual Review of Ecology, Evolution, and Systematics* **46**,  
316 1–23 (2015).
- 317 17. Beisner, B. E., Haydon, D. T. & Cuddington, K. Alternative stable states in ecology.  
318 *Frontiers in Ecology and the Environment* **1**, 376–382 (2003).
- 319 18. Hsieh, C. H., Glaser, S. M., Lucas, A. J. & Sugihara, G. Distinguishing random  
320 environmental fluctuations from ecological catastrophes for the North Pacific Ocean.  
321 *Nature* **435**, 336–340 (2005).
- 322 19. Sugihara G. Nonlinear forecasting for the classification of natural time series.  
323 *Philosophical Transactions of the Royal Society of London. Series A: Physical and*  
324 *Engineering Sciences* **348**, 477–495 (1994).
- 325 20. Sugihara, G. & May, R. M. Nonlinear forecasting as a way of distinguishing chaos  
326 from measurement error in time series. *Nature* **344**, 734–741 (1990).
- 327 21. Benincá, E. *et al.* Chaos in a long-term experiment with a plankton community. *Nature*  
328 **451**, 822–825 (2008).
- 329 22. Sugihara, G. *et al.* Detecting causality in complex ecosystems. *Science* **338**, 496–500  
330 (2012).
- 331 23. Strogatz, S. H. *Nonlinear Dynamics and Chaos: With Applications to Physics, Biology,*  
332 *Chemistry, and Engineering.* (CRC Press, 2015).
- 333 24. Suzuki, K., Nakaoka, S., Fukuda, S. & Masuya, H. Energy landscape analysis  
334 elucidates the multistability of ecological communities across environmental gradients.  
335 *Ecological Monographs* **91**, 1–21 (2021).
- 336 25. Watanabe, T., Masuda, N., Megumi, F., Kanai, R. & Rees, G. Energy landscape and

- 337 dynamics of brain activity during human bistable perception. *Nature Communications*  
338 **5**, 4765 (2014).
- 339 26. Becker, O. M. & Karplus, M. The topology of multidimensional potential energy  
340 surfaces: Theory and application to peptide structure and kinetics. *Journal of Chemical*  
341 *Physics* **106**, (1997).
- 342 27. Deyle, E. R., May, R. M., Munch, S. B. & Sugihara, G. Tracking and forecasting  
343 ecosystem interactions in real time. *Proceedings of the Royal Society B: Biological*  
344 *Sciences* **283**, 20152258 (2016).
- 345 28. Chang, C. W., Ushio, M. & Hsieh, C. hao. Empirical dynamic modeling for beginners.  
346 *Ecological Research* **32**, 785–796 (2017).
- 347 29. Munch, S. B., Brias, A., Sugihara, G. & Rogers, T. L. Frequently asked questions about  
348 nonlinear dynamics and empirical dynamic modelling. *ICES Journal of Marine Science*  
349 (2019) doi:10.1093/icesjms/fsz209.
- 350 30. Lahti, L., Salojärvi, J., Salonen, A., Scheffer, M. & de Vos, W. M. Tipping elements in  
351 the human intestinal ecosystem. *Nature Communications* **5**, 1–10 (2014).
- 352 31. David, L. A. *et al.* Diet rapidly and reproducibly alters the human gut microbiome.  
353 *Nature* **505**, 559–563 (2014).
- 354 32. Ushio, M. Interaction capacity as a potential driver of community diversity.  
355 *Proceedings of the Royal Society B: Biological Sciences* **289**, 20212690 (2022).
- 356 33. Goldford, J. E. *et al.* Emergent simplicity in microbial community assembly. *Science*  
357 (1979) **361**, 469–474 (2018).
- 358 34. Scheffer, M. & Carpenter, S. R. Catastrophic regime shifts in ecosystems: Linking  
359 theory to observation. *Trends in Ecology and Evolution* **18**, 648–656 (2003).
- 360 35. Scheffer, M., Carpenter, S., Foley, J. a, Folke, C. & Walker, B. Catastrophic shifts in  
361 ecosystems. *Nature* **413**, 591–596 (2001).
- 362 36. May, R. M. Thresholds and breakpoints in ecosystems with a multiplicity of stable  
363 states. *Nature* vol. 269 Preprint at <https://doi.org/10.1038/269471a0> (1977).
- 364 37. Ovaskainen, O. *et al.* How are species interactions structured in species-rich

- 365 communities? A new method for analysing time-series data. *Proceedings of the Royal*  
366 *Society B: Biological Sciences* **284**, 20170768 (2017).
- 367 38. Hsieh, C. H., Glaser, S. M., Lucas, A. J. & Sugihara, G. Distinguishing random  
368 environmental fluctuations from ecological catastrophes for the North Pacific Ocean.  
369 *Nature* **435**, 336–340 (2005).
- 370 39. Takens F. Detecting strange attractors in turbulence. in *Dynamical Systems and*  
371 *Turbulence* (eds. Rand DA & Young L-S) 366–381 (Springer, 1981).
- 372 40. Ushio, M. *et al.* Fluctuating interaction network and time-varying stability of a natural  
373 fish community. *Nature* **554**, 360–363 (2018).
- 374 41. Cenci, S. & Saavedra, S. Non-parametric estimation of the structural stability of non-  
375 equilibrium community dynamics. *Nature Ecology and Evolution* **3**, 912–918 (2019).
- 376 42. Akobeng, A. K. Understanding diagnostic tests 3: Receiver operating characteristic  
377 curves. *Acta Paediatrica, International Journal of Paediatrics* **96**, 644–647 (2007).
- 378 43. Chang, C. *et al.* Reconstructing large interaction networks from empirical time series  
379 data. *Ecology Letters* **24**, 2763–2774 (2021).
- 380 44. Amor, D. R., Ratzke, C. & Gore, J. Transient invaders can induce shifts between  
381 alternative stable states of microbial communities. *Science Advances* **6**, 1–9 (2020).
- 382 45. Jones, C. G., Lawton, J. H. & Shachak, M. Organisms as ecosystem engineers. *Oikos*  
383 **69**, 373–386 (1994).
- 384 46. Odling-Smee, F. J., Laland, K. N. & Feldman, M. W. *Niche construction: The*  
385 *neglected process in evolution. Niche Construction: The Neglected Process in*  
386 *Evolution (MPB-37)* vol. 9781400847266 (2013).
- 387 47. Mee, M. T., Collins, J. J., Church, G. M. & Wang, H. H. Syntrophic exchange in  
388 synthetic microbial communities. *Proc Natl Acad Sci U S A* **111**, E2149–E2156 (2014).
- 389 48. Vrancken, G., Gregory, A. C., Huys, G. R. B., Faust, K. & Raes, J. Synthetic ecology of  
390 the human gut microbiota. *Nature Reviews Microbiology* **17**, 754–763 (2019).
- 391 49. Ushio, M. *et al.* Quantitative monitoring of multispecies fish environmental DNA using  
392 high-throughput sequencing. *Metabarcoding and Metagenomics* **2**, 1–15 (2018).

- 393 50. Caporaso, J. G. *et al.* Global patterns of 16S rRNA diversity at a depth of millions of  
394 sequences per sample. *Proc Natl Acad Sci U S A* **108**, 4516–4522 (2011).
- 395 51. Apprill, A., McNally, S., Parsons, R. & Weber, L. Minor revision to V4 region SSU  
396 rRNA 806R gene primer greatly increases detection of SAR11 bacterioplankton.  
397 *Aquatic Microbial Ecology* **75**, 129–137 (2015).
- 398 52. Klappenbach, J. A., Saxman, P. R., Cole, J. R. & Schmidt, T. M. Rrndb: The ribosomal  
399 RNA operon copy number database. *Nucleic Acids Research* **29**, 181–184 (2001).
- 400 53. Lundberg, D. S., Yourstone, S., Mieczkowski, P., Jones, C. D. & Dangl, J. L. Practical  
401 innovations for high-throughput amplicon sequencing. *Nature Methods* **10**, 999–1002  
402 (2013).
- 403 54. Stevens, J. L., Jackson, R. L. & Olson, J. B. Slowing PCR ramp speed reduces chimera  
404 formation from environmental samples. *Journal of Microbiological Methods* **93**, 203–  
405 205 (2013).
- 406 55. Hamady, M., Walker, J. J., Harris, J. K., Gold, N. J. & Knight, R. Error-correcting  
407 barcoded primers for pyrosequencing hundreds of samples in multiplex. *Nature*  
408 *Methods* **5**, 235–237 (2008).
- 409 56. Tanabe, A. Claident v0.2.2018.05.29, a software distributed by author at  
410 <http://www.fifthdimension.jp/>. (2018).
- 411 57. Callahan, B. J. *et al.* DADA2: High-resolution sample inference from Illumina  
412 amplicon data. *Nature Methods* **13**, 581–583 (2016).
- 413 58. Wang, Q., Garrity, G. M., Tiedje, J. M. & Cole, J. R. Naïve Bayesian classifier for rapid  
414 assignment of rRNA sequences into the new bacterial taxonomy. *Applied and*  
415 *Environmental Microbiology* **73**, 5261–5267 (2007).
- 416 59. Quast, C. *et al.* The SILVA ribosomal RNA gene database project: Improved data  
417 processing and web-based tools. *Nucleic Acids Research* **41**, D590–D596 (2013).
- 418 60. Oksanen, J. The vegan package available at [https://cran.r-](https://cran.r-project.org/web/packages/vegan/index.html)  
419 [project.org/web/packages/vegan/index.html](https://cran.r-project.org/web/packages/vegan/index.html). (2007).
- 420 61. Wood, S. mgcv: Mixed GAM computation vehicle with automatic smoothness  
421 estimation available at <https://cran.r-project.org/web/packages/mgcv/index.html>.

422 (2022).

423 62. Navarrete, R. Embeddings and prediction of dynamical time series. (The University of  
424 Michigan, 2018).

425 63. Cenci, S., Sugihara, G. & Saavedra, S. Regularized S-map for inference and  
426 forecasting with noisy ecological time series. *Methods in Ecology and Evolution* **10**,  
427 650–660 (2019).

428

429

## 430 **Methods**

### 431 **Continuous-culture of microbiome**

432 To set up experimental bacterial communities, we prepared two types of source inocula (soil  
433 and aquatic microbiomes) and three media (oatmeal, oatmeal-peptone, and peptone): for each  
434 combination of source media and inocula (six experimental treatments), eight replicate  
435 communities were established (in total, two source microbiomes  $\times$  three media  $\times$  eight  
436 replicates = 48 experimental communities; Extended Data Fig. 1a). We used natural microbial  
437 communities including diverse species, rather than “synthetic” communities with pre-defined  
438 diversity, as source microbiomes of the experiment. One of the source microbiomes derives  
439 from the soil collected from the A layer (0-10 cm in depth) in the research forest of Center for  
440 Ecological Research, Kyoto University, Kyoto, Japan (34.972 °N; 135.958 °E). After  
441 sampling, 600 g of the soil was sieved with a 2-mm mesh and then 5 g of the sieved soil was  
442 mixed in 30 mL autoclaved distilled water. The source microbiome was further diluted 10  
443 times with autoclaved distilled water. The source aquatic microbiome was prepared by  
444 collecting 200 mL of water from a pond (“Shoubuike”) near Center for Ecological Research  
445 (34.974 °N, 135.966 °E). In the laboratory, 3 mL of the collected water was mixed with 27 mL  
446 of distilled water in a 50 mL centrifuge tube. We then introduced the source soil or aquatic  
447 microbiomes into three types of media: oatmeal broth [0.5% (w/v) milled oatmeal (Nisshoku  
448 Oats; Nippon Food Manufacturer); Medium-A], oatmeal-peptone broth [0.5% (w/v) milled  
449 oatmeal + 0.5% (w/v) peptone (Bacto Peptone; BD; lot number: 7100982); Medium-B], and  
450 peptone broth [0.5% (w/v) peptone; Medium-C]. In our preliminary experiments,  
451 microbiomes cultured with Medium-A (oatmeal) tended to show high species diversity, while  
452 those cultured with Medium-C (peptone) were constituted by smaller number of bacterial  
453 species. Thus, we expected that diverse types of microbiome dynamics would be observed  
454 with the three medium conditions. Among the three media, Medium-B had the highest  
455 concentrations of non-purgeable organic carbon (NPOC) and total nitrogen (TN), while  
456 Medium-A was the poorest both in NPOC and TN: Medium-C had the intermediate properties  
457 (Extended Data Fig. 1b).

458 In each well a of 2-mL deep well plate, 200  $\mu$ L of a diluted source microbiome and 800  
459  $\mu$ L of medium were installed. The deep-well plate was kept shaken at 1,000 rpm using a  
460 microplate mixer NS-4P (AS ONE Corporation, Osaka) at 23 °C for five days. After the five-  
461 day pre-incubation, 200  $\mu$ L out of 1,000- $\mu$ L culture medium was sampled from each of the 48  
462 deep wells after mixing (pipetting) every 24 hours for 110 days. In each sampling event, 200



463  $\mu\text{L}$  of fresh medium was added to each well so that the total culture volume was kept constant.  
464 In total, 5,280 samples (48 communities/day  $\times$  110 days) were collected. Note that on Day 82,  
465 200- $\mu\text{L}$  of fresh Medium-B was accidentally added to samples of Medium-A but not to those  
466 of Medium-B. While the microbiomes under Medium-A treatments experienced increase in  
467 total DNA copy concentrations late in the time-series, relative abundance remained relatively  
468 constant from Day 60 to 110 (Extended Data Figs. 2-3), suggesting limited impacts of the  
469 accidental addition of the medium on microbial community compositions.

470 To extract DNA from each sample, 25  $\mu\text{L}$  of the collected aliquot was mixed with 50  $\mu\text{L}$   
471 lysis buffer (0.0025 % SDS, 20 mM Tris (pH 8.0), 2.5 mM EDTA, and 0.4 M NaCl) and  
472 proteinase K ( $\times 1/100$ ). The mixed solution was incubated at 37  $^{\circ}\text{C}$  for 60 min followed by 95  
473  $^{\circ}\text{C}$  for 10 min and then the solution was vortexed for 10 min to increase DNA yield.

474

#### 475 **Quantitative 16S rRNA sequencing**

476 To reveal the increase/decrease of population size for each microbial ASV, a quantitative  
477 amplicon sequencing method<sup>32,49</sup> was used based on Illumina sequencing platform. While  
478 most existing microbiome studies were designed to reveal the “relative” abundance of  
479 microbial ASVs or operational taxonomic units (OTUs), analyses of population dynamics, in  
480 principle, require the time-series information of “absolute” abundance. In our quantitative  
481 amplicon sequencing, five standard DNA sequence variants with different concentrations of  
482 artificial 16S rRNA sequences (0.1, 0.05, 0.02, 0.01, and 0.005 nM) were added to PCR  
483 master mix solutions (Extended Data Fig. 1a). The DNA copy concentration gradient of the  
484 standard DNA variants yielded calibration curves between Illumina sequencing read numbers  
485 and DNA copy numbers (concentrations) of the 16S rRNA region in PCR reactions, allowing  
486 estimation of original DNA concentrations of target samples<sup>32,49</sup> (Extended Data Fig. 1c-d).  
487 The five standard DNAs were designed to be amplified with a primer set of 515f<sup>50</sup> and  
488 806rB<sup>51</sup> but not to be aligned to the V4 region of any existing prokaryote 16S rRNA. Note  
489 that the number of 16S rRNA copies per genome generally varies among prokaryotic taxa<sup>52</sup>  
490 and hence 16S rRNA copy concentration is not directly the optimal proxy of cell or biomass  
491 concentration. However, in our study, estimates of 16S rRNA copy concentrations are used to  
492 monitor increase/decrease of abundance (i.e., population dynamics) *within* the time-series of  
493 each microbial ASV: hence, variation in the number 16S rRNA copy numbers among  
494 microbial taxa had no qualitative effects on the subsequent population- and community-

495 ecological analyses. Even if the concentrations of PCR inhibitor molecules in DNA extracts  
496 vary among time-series samples, potential bias caused by such inhibitors can be corrected  
497 based on the abovementioned method using internal standards (i.e., standard DNAs within  
498 PCR master solutions).

499 Prokaryote 16S rRNA region was PCR-amplified with the forward primer 515f fused  
500 with 3–6-mer Ns for improved Illumina sequencing quality and the forward Illumina  
501 sequencing primer (5'- TCG TCG GCA GCG TCA GAT GTG TAT AAG AGA CAG- [3–6-  
502 mer Ns] – [515f] -3') and the reverse primer 806rB fused with 3–6-mer Ns for improved  
503 Illumina sequencing quality<sup>53</sup> and the reverse sequencing primer (5'- GTC TCG TGG GCT  
504 CGG AGA TGT GTA TAA GAG ACA G [3–6-mer Ns] - [806rB] -3') (0.2 µM each). The  
505 buffer and polymerase system of KOD One (Toyobo) was used with the temperature profile  
506 of 35 cycles at 98 °C for 10 s, 55 °C for 30 s, 68 °C for 50 s. To prevent generation of chimeric  
507 sequences, the ramp rate through the thermal cycles was set to 1 °C/sec<sup>54</sup>. Illumina sequencing  
508 adaptors were then added to respective samples in the supplemental PCR using the forward  
509 fusion primers consisting of the P5 Illumina adaptor, 8-mer indexes for sample identification<sup>55</sup>  
510 and a partial sequence of the sequencing primer (5'- AAT GAT ACG GCG ACC ACC GAG  
511 ATC TAC AC - [8-mer index] - TCG TCG GCA GCG TC -3') and the reverse fusion primers  
512 consisting of the P7 adaptor, 8-mer indexes, and a partial sequence of the sequencing primer  
513 (5'- CAA GCA GAA GAC GGC ATA CGA GAT - [8-mer index] - GTC TCG TGG GCT  
514 CGG -3'). KOD One was used with a temperature profile: followed by 8 cycles at 98 °C for  
515 10 s, 55 °C for 30 s, 68 °C for 50 s (ramp rate = 1 °C/s). The PCR amplicons of the samples  
516 were then pooled after a purification/equalization process with the AMPureXP Kit (Beckman  
517 Coulter). Primer dimers, which were shorter than 200 bp, were removed from the pooled  
518 library by supplemental purification with AMPureXP: the ratio of AMPureXP reagent to the  
519 pooled library was set to 0.6 (v/v) in this process. The sequencing libraries were processed in  
520 an Illumina MiSeq sequencer (271 forward (R1) and 231 reverse (R4) cycles; 10% PhiX  
521 spike-in).

522

## 523 **Bioinformatics**

524 In total, 67,537,480 sequencing reads were obtained in the Illumina sequencing. The raw  
525 sequencing data were converted into FASTQ files using the program bcl2fastq 1.8.4  
526 distributed by Illumina. The output FASTQ files were then demultiplexed with the program

527 Claident v0.2. 2018.05.29<sup>56</sup>. The sequencing reads were subsequently processed with the  
528 program DADA2<sup>57</sup> v.1.13.0 of R 3.6.0 to remove low-quality data. The molecular  
529 identification of the obtained ASVs was performed based on the naive Bayesian classifier  
530 method<sup>58</sup> with the SILVA v.132 database<sup>59</sup>. In total, 399 prokaryote (bacterial or archaeal)  
531 ASVs were detected. We obtained a sample  $\times$  ASV matrix, in which a cell entry depicted the  
532 concentration of 16S rRNA copies of an ASV in a sample. In this process of estimating  
533 original DNA copy numbers (concentrations) of respective ASVs from sequencing read  
534 numbers in each sample, the samples in which Pearson's coefficients of correlations between  
535 sequencing read numbers and standard DNA copy numbers (i.e., correlation coefficients  
536 representing calibration curves) were less than 0.7 (in total, 430 samples out of 5,280  
537 samples) were removed as those with unreliable estimates. Samples with less than 350 reads  
538 were discarded as well. Because missing values within time-series data are not tolerated in  
539 some of the downstream analyses (e.g., empirical dynamic modeling), they were substituted  
540 by interpolated values, which were obtained as means of the time points immediately before  
541 and after focal missing time points. The ASVs that appeared 5 or more samples in any of the  
542 replicate communities were retained in the following analyses: 264 ASVs representing 108  
543 genera remained in the dataset. From the sample  $\times$  ASV matrix, we calculated  $\alpha$ -diversity  
544 (Shannon's  $H'$ ) of the ASV compositions in each experimental replicate on each day. We also  
545 evaluated dissimilarity of community compositions in all pairs of sampling days in each  
546 replicate community using Bray-Curtis metric of  $\beta$ -diversity as implemented in the vegan  
547 2.5.5 package<sup>60</sup> of R. For each ASV in each replicate community, a parameter representing the  
548 nonlinearity of the population dynamics<sup>19,38</sup> ( $\theta$ ) was estimated based on S-map analysis of  
549 absolute abundance as detailed below in order to evaluate the overall nature of the time-series  
550 data.

551

## 552 **Community dynamics**

553 We evaluated the degree of community-compositional changes for time point  $t$  based on the  
554 Bray-Curtis  $\beta$ -diversity through time. To remove effects of minor fluctuations and track only  
555 fundamental changes of community structure, average community compositions from time  
556 points  $t - 4$  to  $t$  and those from  $t + p$  to  $t + p + 4$  (i.e., 5-day time-windows) were calculated  
557 before evaluating degree of community changes for time point  $t$  and time step  $p$  in each  
558 replicate community. Dissimilarity of community compositions between the time windows  
559 before (from  $t - 4$  to  $t$ ) and after ( $t + p$  to  $t + p + 4$ ) each target time point  $t$  with a given time

560 lag  $p$  was calculated based on Bray-Curtis  $\beta$ -diversity as a measure of abrupt (sudden and  
561 substantial) community changes (hereafter, “abruptness” of community-compositional  
562 changes). A high value of this index indicates that abrupt community-compositional changes  
563 occurred around time point  $t$ , while a low value represents a (quasi-)stable mode of  
564 community dynamics. We also evaluated temporal changes of community compositions using  
565 nonmetric multidimensional scaling (NMDS) with the R package `vegan`.

566

## 567 **Energy landscape analysis**

568 On the assumption that drastic changes in microbiome dynamics are described as shifts  
569 between local equilibria (i.e., alternative stable states), we reconstructed the structure of the  
570 “energy landscape<sup>24,25</sup>” in each experimental treatment (tutorials of energy landscape analyses  
571 are available at <https://community.wolfram.com/groups/-/m/t/2358581>). Because external  
572 environmental conditions (e.g., temperature) was kept constant in the experiment, a fixed  
573 “energy landscape” of community states was assumed for each of the six experimental  
574 treatments. Therefore, probabilities of community states  $p(\vec{\sigma}^{(k)})$  are given by

$$575 \quad p(\vec{\sigma}^{(k)}) = e^{-H(\vec{\sigma}^{(k)})} / Z$$

$$576 \quad Z = \sum_{l=1}^{2^S} e^{-H(\vec{\sigma}^{(l)})},$$

577 where  $\vec{\sigma}^{(k)} = (\sigma_1^{(k)}, \sigma_2^{(k)}, \dots, \sigma_S^{(k)})$  is a community state vector of  $k$ -th community state and  $S$   
578 is the total number of taxa (e.g., ASVs, species, or genera) examined.  $\sigma_i^{(k)}$  is a binary  
579 variable that represents presence (1) or absence (0) of taxon  $i$ : i.e., there are a total of  $2^S$   
580 community states. Then, the energy of the community state  $\vec{\sigma}^{(k)}$  is given by

$$581 \quad H(\vec{\sigma}^{(k)}) = -\sum_{i=1}^S h_i \sigma_i^{(k)} - \sum_{i=1}^S \sum_{j=1}^S J_{ij} \sigma_i^{(k)} \sigma_j^{(k)} / 2,$$

582 where  $h_i$  is the net effect of implicit abiotic factors, by which  $i$ -th taxon is more likely to  
583 present ( $h_i > 0$ ) or not ( $h_i < 0$ ), and  $J_{ij}$  represents a co-occurrence pattern of  $i$ -th and  $j$ -th taxa.  
584 Since the logarithm of the probability of a community state is inversely proportional to  
585  $H(\vec{\sigma}^{(k)})$ , a community state having lower  $H$  is more frequently observed. To consider  
586 dynamics on an assembly graph defined as a network whose  $2^S$  nodes represent possible  
587 community states and the edges represents transition path between them (two community  
588 states are adjacent only if they have the opposite presence/absence status for just one species),

589 we assigned energy to nodes with the above equation, and so imposed the directionality in  
590 state transitions. Then, we identified the stable state communities as the energy minima of the  
591 weighted network (nodes having the lowest energy compared to all its neighbors), and  
592 determined their basins of attraction based on a steepest descent procedure starting from each  
593 node. The data of ASV-level compositions were used in the calculation of community state  
594 energy using Mathematica v12.0.0.0. The “energy” estimates were then plotted against the  
595 NMDS axes representing community states of the microbiome samples in each experimental  
596 treatment. Spline smoothing of the landscape was performed with optimized penalty scores  
597 using the mgcv v.1.8-40 package<sup>61</sup> of R.

598

### 599 **Empirical dynamic modeling**

600 In parallel with the energy landscape analysis assuming the presence of local equilibria, we  
601 also analyzed the microbiome time-series data by assuming the presence of complex  
602 attractors. In this aim, we applied the framework of “empirical dynamic modeling<sup>19,20,29,40</sup>”. In  
603 general, biological community dynamics are driven by a number of variables (e.g., abundance  
604 of respective species and abiotic environmental factors). In the analysis of a multi-variable  
605 dynamic system in which only some of variables are observable, state space constituted by  
606 time-lag axes of observable variables can represent the whole system as shown in Takens’  
607 embedding theorem<sup>39</sup>. Thus, for each ASV in each experimental treatment, we conducted  
608 Takens’ embedding to reconstruct state space which consisted of time-delayed coordinates of  
609 the ASV’s absolute abundance (e.g., 16S rRNA copy concentration estimates). The optimal  
610 number of embedding dimensions<sup>29,39</sup> ( $E$ ) was obtained by finding  $E$  giving the smallest root-  
611 mean-square error (RMSE) in pre-run forecasting with simplex projection<sup>20</sup> or S-map<sup>19</sup> as  
612 detailed below. Taking into account a previous study examining embedding dimensions<sup>62</sup>,  
613 optimal  $E$  was explored within the range from 1 to 20. Prior to the embedding, all the  
614 variables were z-standardized (i.e., zero-mean and unit-variance) across the time-series of  
615 each ASV in each replicate community.

616

### 617 **Population-level forecasting**

618 Based on the state space reconstructed with Takens’ embedding, simplex projection<sup>20</sup> was  
619 applied for forecasting of ecological processes in our experimental microbiomes. For each

620 target replicate community, univariate embedding of each ASV was performed using the data  
621 of the seven remaining replicate communities. Therefore, the reference databases for the  
622 embedding did not include the information of the target replicate community (Fig. 2a),  
623 providing platforms for evaluating forecasting skill.

624 In simplex projection, a coordinate within the reconstructed state space was explored at  
625 a focal time point ( $t^*$ ) within the population dynamics of a focal ASV in a target replicate  
626 community (e.g., replicate community 8): the coordinate can be described as  $[x_{target\_rep}(t^*),$   
627  $x_{target\_rep}(t^* - 1), x_{target\_rep}(t^* - 2)]$  when  $E = 3$ . For the focal coordinate,  $E + 1$  neighboring  
628 points are explored from the reference database consisting of the seven remaining replicate  
629 communities (e.g., replicate communities 1–7; Fig. 2a). For each of the neighboring points,  
630 the corresponding points at  $p$ -time-step forward ( $p$ -days ahead) are identified. The abundance  
631 estimate of a focal ASV in the target replicate community at  $p$ -time-step forward [e.g.,  
632  $\hat{x}_{target\_rep}(t^* + p)$ ] is then obtained as weighted average of the values of the highlighted  $p$ -time-  
633 step-forward points within the reference database (Fig. 2a). The weighting was decreased with  
634 Euclidean distance between  $x_{target\_rep}(t^*)$  and its neighboring points within the reference  
635 database. This forecasting of population dynamics was performed for each ASV in each target  
636 replicate community at each time point. The number of time steps in the forecasting (i.e.,  $p$ )  
637 was set at 1 (one-day-ahead forecasting) and 7 (seven-day-ahead forecasting).

638 While simplex projection explores neighboring points around a target point, S-map<sup>19</sup>  
639 uses all the data points after weighting contributions of each point within a reference database  
640 using a parameter representing nonlinearity of the system. In Takens' embedding, the state  
641 space of a target replicate for forecasting at time  $t$  is defined as

$$642 \quad z_{target\_rep}(t) = \{z_{1,target\_rep}(t), z_{2,target\_rep}(t), \dots, z_{E,target\_rep}(t)\},$$

643 where  $E$  is embedding dimension. Values on the second and higher dimensions  
644  $\{z_{2,target\_rep}(t), \dots, z_{E,target\_rep}(t)\}$  are represented by time-delayed coordinates of a focal  
645 ASV. Likewise, the state space of the remaining replicates (i.e., the reference database) is  
646 defined as

$$647 \quad z_{ref}(t') = \{z_{1,ref}(t'), z_{2,ref}(t'), \dots, z_{E,ref}(t')\},$$

648 where  $t'$  represents each of non-overlapping time points within the reference database [e.g.,  
649  $\{10001, 10002, \dots, 10110\}$  and  $\{20001, 20002, \dots, 20110\}$  for reference replicate 1 and 2,  
650 respectively]. For a target time point  $t^*$  within the time-series data of a target replicate

651 community, a local linear model  $\mathbf{C}$  is produced to predict the future abundance of a focal  
 652 ASV [i.e.,  $z_{1,target\_rep}(t^* + p)$ ] from the state-space vector at time point  $z_{target\_rep}(t^*)$  as  
 653 follows:

$$654 \quad \hat{z}_{1,target\_rep1}(t^* + p) = C_0 + \sum_{j=1}^E \mathbf{C}_j z_j(t^*).$$

655 This linear model is fit to the vectors in the reference databases. In the regression analysis,  
 656 data points close to the target point  $z_{target\_rep}(t^*)$  have greater weighting. The model  $\mathbf{C}$  is  
 657 then the singular value decomposition solution to the equation  $b = \mathbf{A}\mathbf{C}$ . In this equation,  $b$  is  
 658 set as an  $n$ -dimensional vector of the weighted future values of  $z_{1,ref}(t_i')$  for each point ( $t_i'$ )  
 659 in the reference database ( $n$  is the number of points in the set of  $t_i'$ ):

$$660 \quad b_i = w(\|z_{ref}(t_i') - z_{target\_rep}(t^*)\|)z_{1,ref}(t_i' + p).$$

661 Meanwhile,  $A$  is an  $n \times E$  dimensional matrix given by

$$662 \quad A_{ij} = w(\|z_{ref}(t_i') - z_{target\_rep}(t^*)\|)z_{j,ref}(t_i').$$

663 The weighting function  $w$  is defined as

$$664 \quad w(d) = \exp\left(-\frac{\theta d}{\bar{d}}\right),$$

665 where  $\theta$  is the parameter representing the nonlinearity of the data, while mean Euclidean  
 666 distance between reference database points and the target point in the target experimental  
 667 replicate is defined as follows:

$$668 \quad \bar{d} = \frac{1}{n} \sum_{t' \in T_{ref}} \|z_{ref}(t_i') - z_{target\_rep}(t^*)\|,$$

669 where  $T_{ref}$  denotes the set of  $t_i'$ . In our analysis, the optimal value of  $\theta$  was explored among  
 670 eleven levels from 0 (linearity) and 8 (strong nonlinearity) for each ASV in each target  
 671 replicate based on the RMSE of forecasting (optimal  $\theta$  was selected among 0, 0.001, 0.01,  
 672 0.05, 0.1, 0.2, 0.5, 1, 2, 4, and 8). The local linear model  $\mathbf{C}$  was estimated for each time point  
 673 in the target replicate data.

674 We then performed direct comparison between linear and nonlinear approaches of  
 675 forecasting based on empirical dynamics modeling. Specifically, to assume linear dynamics in  
 676 S-map method, the nonlinearity parameter  $\theta$  was set 0 for all the ASVs. We then compared  
 677 forecasting results between linear ( $\theta = 0$ ) and nonlinear (optimized  $\theta$ ) approaches. For the  
 678 forecasting of ASVs in a target replicate community, the data of the remaining seven

679 communities (reference databases) were used as mentioned above.

680 For each ASV in each of the 48 experimental replicates, Spearman's correlation  
681 coefficients between predicted and observed abundance (16S rRNA copy concentrations)  
682 were calculated for each of the nonlinear/linear forecasting methods [simplex projection, S-  
683 map with optimized  $\theta$ , and S-map assuming linearity ( $\theta = 0$ )]. We also examined null model  
684 assuming no change in community structure for a given time step. The time points (samples)  
685 excluded in the data-quality filtering process (see Bioinformatics sub-section) were excluded  
686 from the above evaluation of forecasting skill.

687

### 688 **Reference database size and forecasting skill**

689 To evaluate potential dependence of forecasting skill on the size of reference databases, we  
690 performed a series of analyses with varying numbers of reference replicate communities. For  
691 replicate community for a target replicate community, a fixed number (from 1 to 7) of other  
692 replicate communities within each experimental treatment were retrieved as reference  
693 databases: all combinations of reference communities were examined for each target replicate  
694 community. For each microbial ASV in each target replicate community, forecasting of  
695 population size was performed based on S-map with optimized  $\theta$  as detailed above.  
696 Spearman's correlation between predicted and observed population size across the time-series  
697 was then calculated for each ASV in each target replicate community. The correlation  
698 coefficients were compared between different numbers of reference database communities  
699 based on Welch's *t*-test in each experimental treatment.

700

### 701 **Community-level forecasting**

702 The above population-level results based on empirical dynamics modeling were then used for  
703 forecasting community-level dynamics. For a focal time point (day) in a target experimental  
704 replicate, the 16S rRNA copy concentration estimates (predicted abundance) of respective  
705 ASVs were compiled, yielding predicted community structure (i.e., predicted relative  
706 abundance of ASVs). The predicted and observed (actual) ASV compositions (relative  
707 abundance) of respective target replicates were then plotted on a NMDS surface for each of  
708 the six experimental treatments. In addition, we evaluated dependence of community-level  
709 forecasting results on experimental conditions (source inocula and media),  $\alpha$ -diversity



710 (Shannon's  $H'$ ) of ASVs, and mean  $\beta$ -diversity against other replicates in a multivariate  
711 ANOVA model of predicated vs. observed community dissimilarity.

712

### 713 **Anticipating abrupt community shifts**

714 We then examined whether indices derived from the energy landscape analysis and/or  
715 empirical dynamics modeling could be used to anticipate drastic changes in community  
716 structure.

717 In the framework of energy landscape analysis, we calculated two types of indices  
718 based on the estimated landscapes of microbiome dynamics (Fig. 3a). One is deviation of  
719 current community-state energy from the possible lowest energy within the target basins  
720 (hereafter, energy gap; Fig. 3a): this index represents how current community states are  
721 inflated from local optima (i.e., "bottom" of basins). The other is "stable-state entropy"<sup>24</sup>,  
722 which is calculated based on the random-walk-based simulation from current community  
723 states to bottoms of any energy landscape basins (i.e., alternative stable states). A starting  
724 community state is inferred to have high entropy if reached stable states are variable among  
725 random-walk iterations: the stable-state entropy is defined as the Shannon's entropy of the  
726 final destinations of the random walk<sup>24</sup>. Therefore, communities approaching abrupt structural  
727 changes are expected to have high stable-state entropy because they are inferred to cross over  
728 "ridges" on energy landscapes. For an analysis of a target replicate community, energy  
729 landscapes were reconstructed based on the data of the remaining seven replicate  
730 communities.

731 In the framework of empirical dynamics modeling (nonlinear mechanics), we calculated  
732 "local Lyapunov stability"<sup>40</sup> (local dynamic stability) and "local structural stability"<sup>41</sup> based  
733 on Jacobian matrices representing movements around reconstructed attractors<sup>27</sup>. Specifically,  
734 based on convergent cross-mapping<sup>22,32</sup> and multivariate extension of S-map<sup>63</sup>, local  
735 Lyapunov stability and structural stability were estimated, respectively, as the absolute value  
736 of the dominant eigenvalue and trace (sum of diagonal elements) of the Jacobian matrices  
737 representing the time-series processes<sup>40</sup>. For a target replicate community, the remaining  
738 seven replicate communities were used for inferring Jacobian matrices. Note that a high score  
739 of local Lyapunov/structural stability represents a potentially unstable community state. In  
740 particular, local Lyapunov scores reflect whether trajectories at any particular time are  
741 converging (local Lyapunov score < 1) or diverging ( $1 < \text{local Lyapunov score}$ )<sup>40</sup>.

742 For each of the above indices, linear regression of abruptness scores of community-  
743 compositional changes was performed for each replicate sample in each experimental  
744 treatment (seven-day-ahead forecasting). The time points (samples) excluded in the data-  
745 quality filtering process (see Bioinformatics sub-section) were excluded from this evaluation  
746 of signal indices.

747 We also examined the diagnostic performance of the signal indices based on the  
748 receiver operating characteristic (ROC) analysis. In seven-day-ahead forecasting, detection  
749 rates (sensitivity) and false detection rates (1 – specificity) of large community-compositional  
750 changes (abruptness > 0.5) were plotted on a two-dimensional surface for each experimental  
751 treatment, yielding area under the ROC curve (AUC) representing diagnostic performance<sup>42</sup>.  
752 The optimal threshold value of each signal index for anticipating abrupt community-  
753 compositional changes (abruptness > 0.5) was then calculated with the Youden index<sup>42</sup> for  
754 each experimental treatment. In addition, for stable-state entropy and local Lyapunov stability,  
755 we calculated optimal threshold values after assembling all the data of Medium-A and  
756 Medium-B treatments.

757

## 758 **Data availability**

759 The 16S rRNA sequencing data are available from the DNA Data Bank of Japan (DDBJ) with  
760 the accession number DRA013352, DRA013353, DRA013354, DRA013355, DRA013356,  
761 DRA013368 and DRA013379. The microbial community data are deposited at the figshare  
762 repository (DOI : 10.6084/m9.figshare.20653440).

763

## 764 **Code availability**

765 All the scripts used to analyze the data are available at the figshare repository (DOI :  
766 10.6084/m9.figshare.20653440).

767

768 **Acknowledgements.** We thank Sayaka Suzuki and Keisuke Koba for support in the  
769 experiment and Tadashi Fukami for insightful comments on the manuscript. Computation  
770 time was provided by the SuperComputer System, Institute for Chemical Research, Kyoto  
771 University. This work was financially supported by JST PRESTO (JPMJPR16Q6), Human

772 Frontier Science Program (RGP0029/2019), JSPS Grant-in-Aid for Scientific Research  
773 (20K20586), NEDO Moonshot Research and Development Program (JPNP18016), and JST  
774 FOREST (JPMJFR2048) to H.T., JSPS Grant-in-Aid for Scientific Research (20K06820 and  
775 20H03010) to K.S., and JSPS Fellowship to H.F. and A.C..

776

777 **Author Contributions.** H.T. designed the work with H.F.. H.F. performed experiments. H.F.  
778 analyzed the data with M.U., K.S., M.S.A., M.Y., and H.T.. H.F. and H.T. wrote the paper  
779 with all the authors.

780

781 **Competing Interests.** The authors declare no competing interests.

782

783 **Correspondence and requests for materials** should be addressed to [fujita.h@ecology.kyoto-](mailto:fujita.h@ecology.kyoto-)  
784 [u.ac.jp](mailto:u.ac.jp) or [toju.hirokazu.4c@kyoto-u.ac.jp](mailto:toju.hirokazu.4c@kyoto-u.ac.jp).

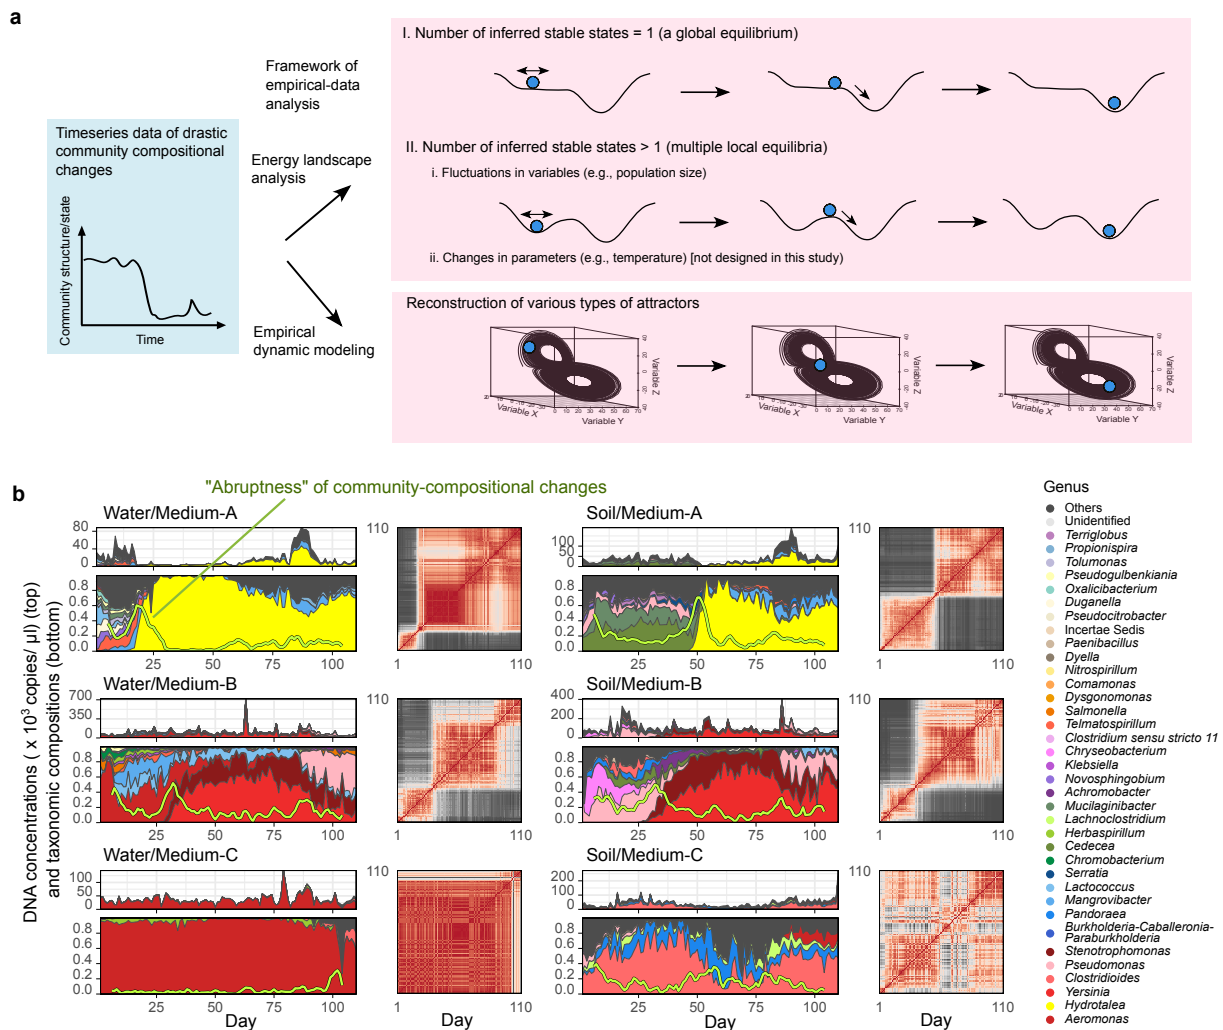

785

786 **Fig. 1 | Experimental microbiome dynamics.** **a**, Assumptions. Drastic structural changes in  
 787 microbiome time-series data are interpreted as transient dynamics towards a global  
 788 equilibrium, shifts between local equilibria (alternative stable states), or dynamics around  
 789 complex forms of attractors. The former two concepts/models can be examined with an  
 790 energy landscape analysis and the latter can be explored based on empirical dynamic  
 791 modeling. **b**, Time-series data of microbial abundance (top left), community compositions  
 792 (relative abundance; bottom left), and Bray-Curtis dissimilarity ( $\beta$ -diversity) of community  
 793 structure between time points (right) are shown for a representative replicate community of  
 794 each experimental treatment. The green lines within the relative abundance plots represent the  
 795 speed and magnitude of community compositional changes (hereafter, “abruptness”) around  
 796 each target time point (time window = 5 days; time lag = 1 day; see Methods). Note that an  
 797 abruptness score larger than 0.5 represents turnover of more than 50 % of microbial ASV  
 798 compositions. See Extended Data Figs. 2-3 for the time-series data of all the 48 communities  
 799 (8 replicates  $\times$  6 treatments).

800

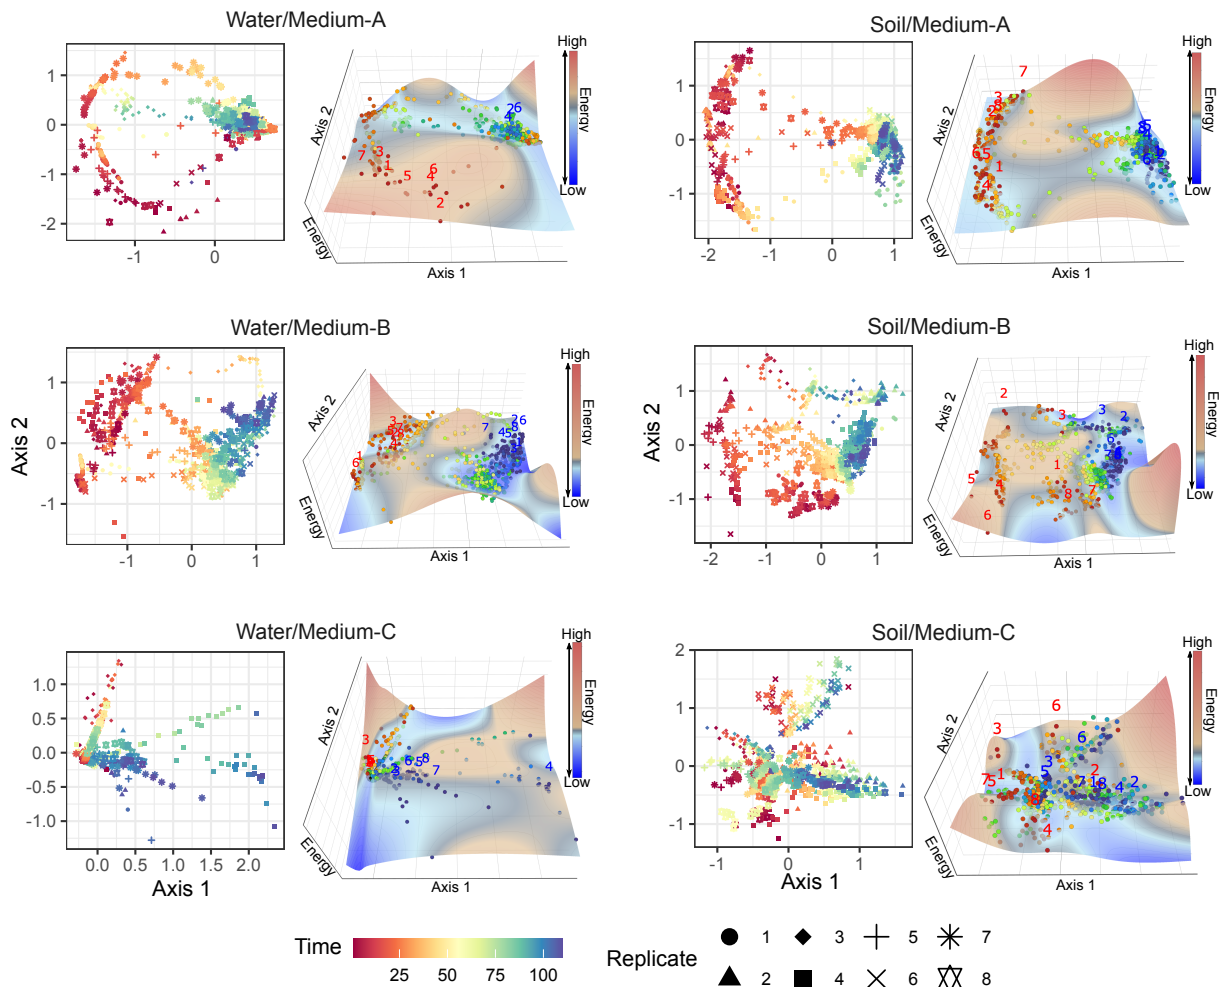

801

802 **Fig. 2 | Energy landscapes of community structure.** The community structure of respective  
 803 time points on NMDS axes (left) and reconstructed energy landscape on the NMDS surface  
 804 (right) are shown for each experimental treatment. Community states (ASV compositions)  
 805 located at lower-energy regions are inferred to be more stable on the energy landscapes. The  
 806 shapes of the landscapes were inferred based on a smoothing spline method with optimized  
 807 penalty parameters. On the energy landscapes, community states of Day 1 and Day 110 are  
 808 respectively shown in red and blue numbers representing replicate communities.

809

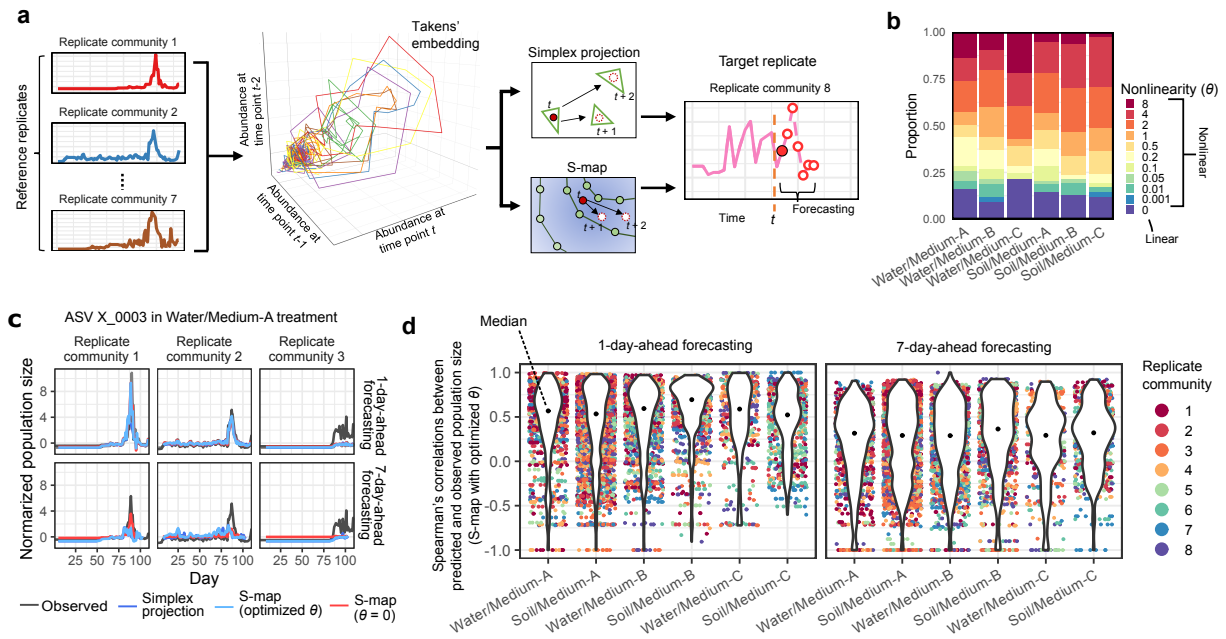

810

811 **Fig. 3 | Forecasting population-level dynamics based on attractor reconstruction.** **a**,  
 812 Workflow of forecasting. For a target replicate community, the reference database of state  
 813 space is reconstructed based on the time-series data of other replicate communities (i.e.,  
 814 reference replicate communities). Future abundance of each ASV in a target replicate  
 815 community was then predicted using the state-space reference databases (see Methods for  
 816 details). **b**, Nonlinearity parameters ( $\theta$ ). Proportions of microbial ASVs showing linear ( $\theta = 0$ )  
 817 and nonlinear ( $\theta > 0$ ) population dynamics are shown. **c**, Example of population-level  
 818 forecasting. Predicted and observed abundance through the time-series are shown for simplex  
 819 projection, S-map with optimized nonlinearity parameter (optimized  $\theta$ ), and S-map assuming  
 820 linearity ( $\theta = 0$ ). For each target replicate community, the remaining seven replicate  
 821 communities were used as references. Results are shown for one-day-ahead and seven-day-  
 822 ahead forecasting of an ASV (X\_0003) in replicate nos. 1-3 of Water/Medium-A treatment.  
 823 See Extended Data Fig. 5 for detailed results. **d**, Spearman's correlation between predicted  
 824 and observed population size is shown for each microbial ASV in each replicate community.

825

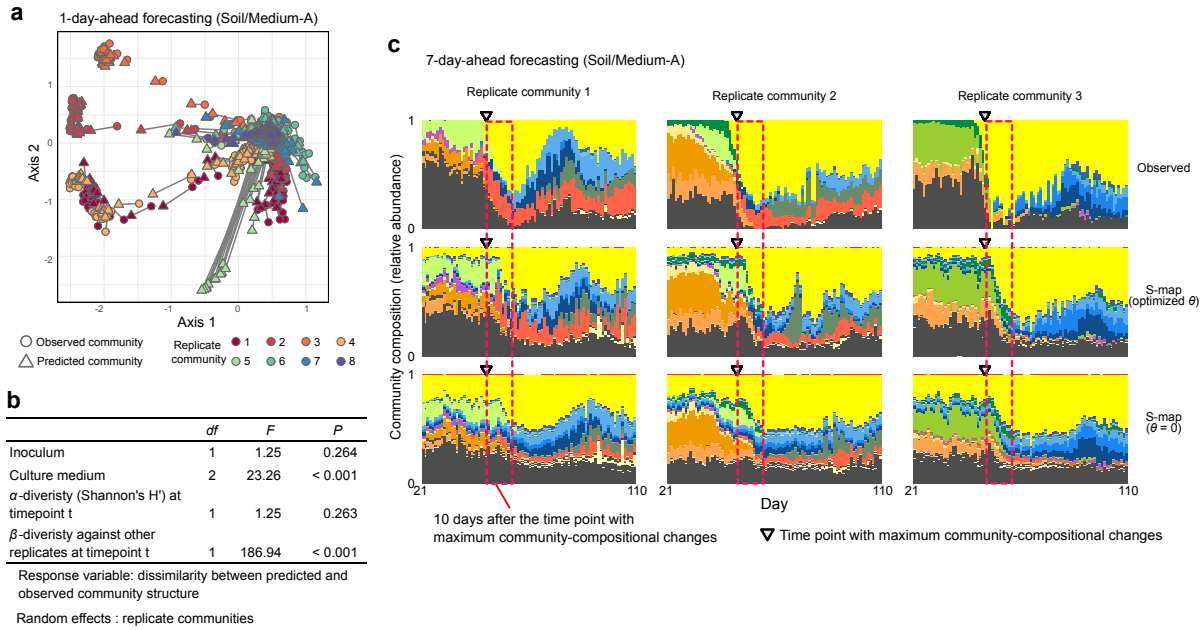

826

827 **Fig. 4 | Forecasting community-level dynamics based on attractor reconstruction. a,**

828 Community-level forecasting. Predicted and observed community structure is linked for each

829 day on the axes of NMDS (prediction based on S-map with optimized  $\theta$ ; one-day-ahead

830 forecasting). Results of Soil/Medium-A treatment are shown: see Extended Data Fig. 7 for

831 full results). **b**, Factors explaining variation in community-level prediction results. A

832 generalized linear mixed model (GLMM) of dissimilarity between predicted and observed

833 community structure was constructed (one-day-ahead forecasting). **c**, Detailed comparison of

834 nonlinear and linear forecasting approaches. S-map results with optimized nonlinearity

835 parameter were compared with results of S-map assuming linear dynamics for all ASVs.

836

837

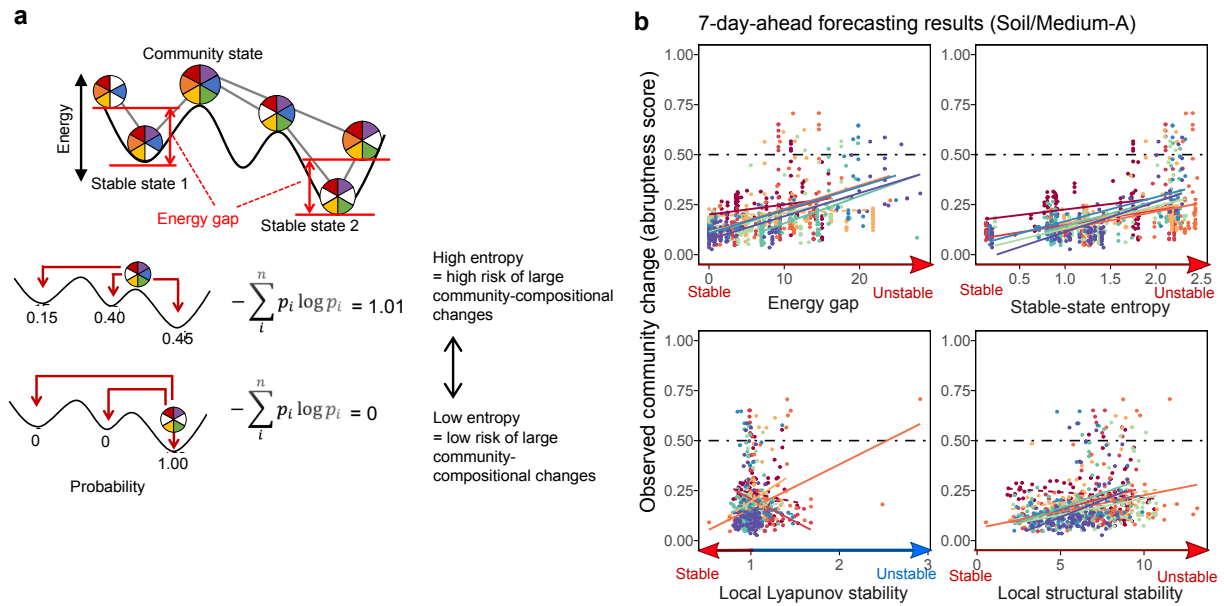

838

839 **Fig. 5 | Anticipating abrupt community shifts.** **a**, Energy gap index. In the framework of  
 840 the energy landscape analysis, difference between the energy of a current community state  
 841 from that of the local energy minimum is defined as the “energy gap” index for anticipating  
 842 drastic community changes. **b**, Stable-state entropy index. Shannon’s entropy estimates based  
 843 on random-walk simulations towards alternative stable states are expected to represent  
 844 instability of current community states on energy landscapes (see Methods for details). **c**,  
 845 Relationship between the degree of community-compositional changes (abruptness) and each  
 846 signal index. Note that a high score of energy gap, stable-state entropy, or local  
 847 Lyapunov/structural stability potentially represents an unstable state. Significant/non-  
 848 significant regressions within respective replicates are shown with solid/dashed lines for each  
 849 panel [false discovery rate (FDR)]. See Extended Data Fig. 9 for detailed results.

850



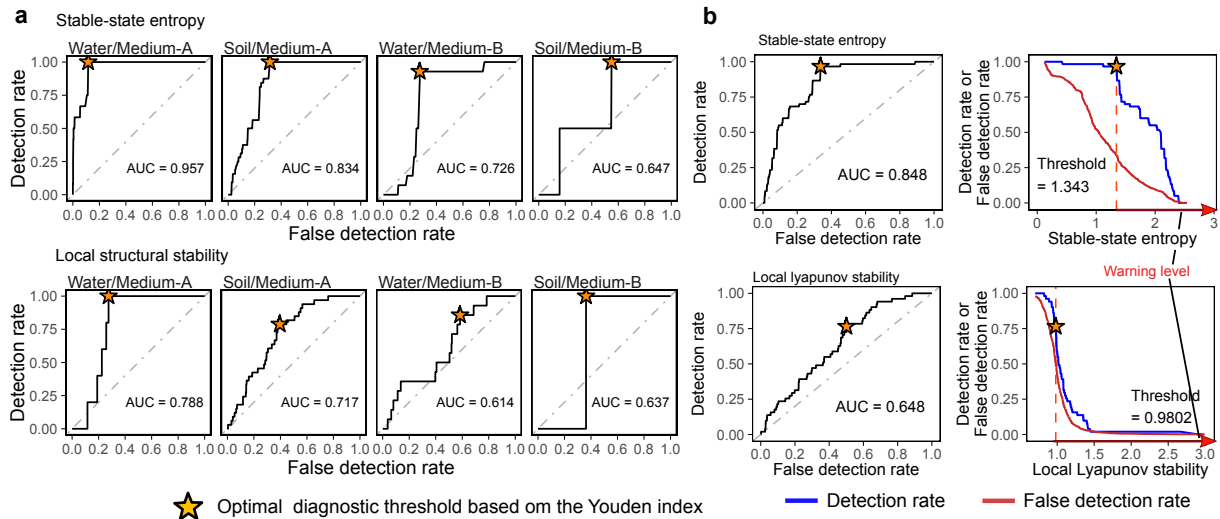

851

852 **Fig. 6 | Thresholds for anticipating drastic community events.** **a**, ROC analysis of  
 853 diagnostic performance. On the two-dimensional surface of detection- and false-detection  
 854 rates of abrupt community-compositional changes (abruptness > 0.5), area under the ROC  
 855 curve (AUC) and optimal detection rate (asterisk) were calculated for each warning signals  
 856 (seven-day-ahead forecasting). A high AUC value indicates a high detection rate of abrupt  
 857 community events with a relatively low false detection rate (maximum AUC value = 1). Note  
 858 that the low AUC values may be attributed to the small number of points with abruptness >  
 859 0.5 in Soil/Medium-B treatment. See Extended Data Fig. 10 for full results. **b**, Optimal  
 860 thresholds for anticipating community collapse. For stable-state entropy (top) and local  
 861 Lyapunov stability (bottom), diagnostic threshold for warning abrupt community changes was  
 862 obtained based on the Youden index after compiling all the data of Medium-A and Medium-B  
 863 treatments.

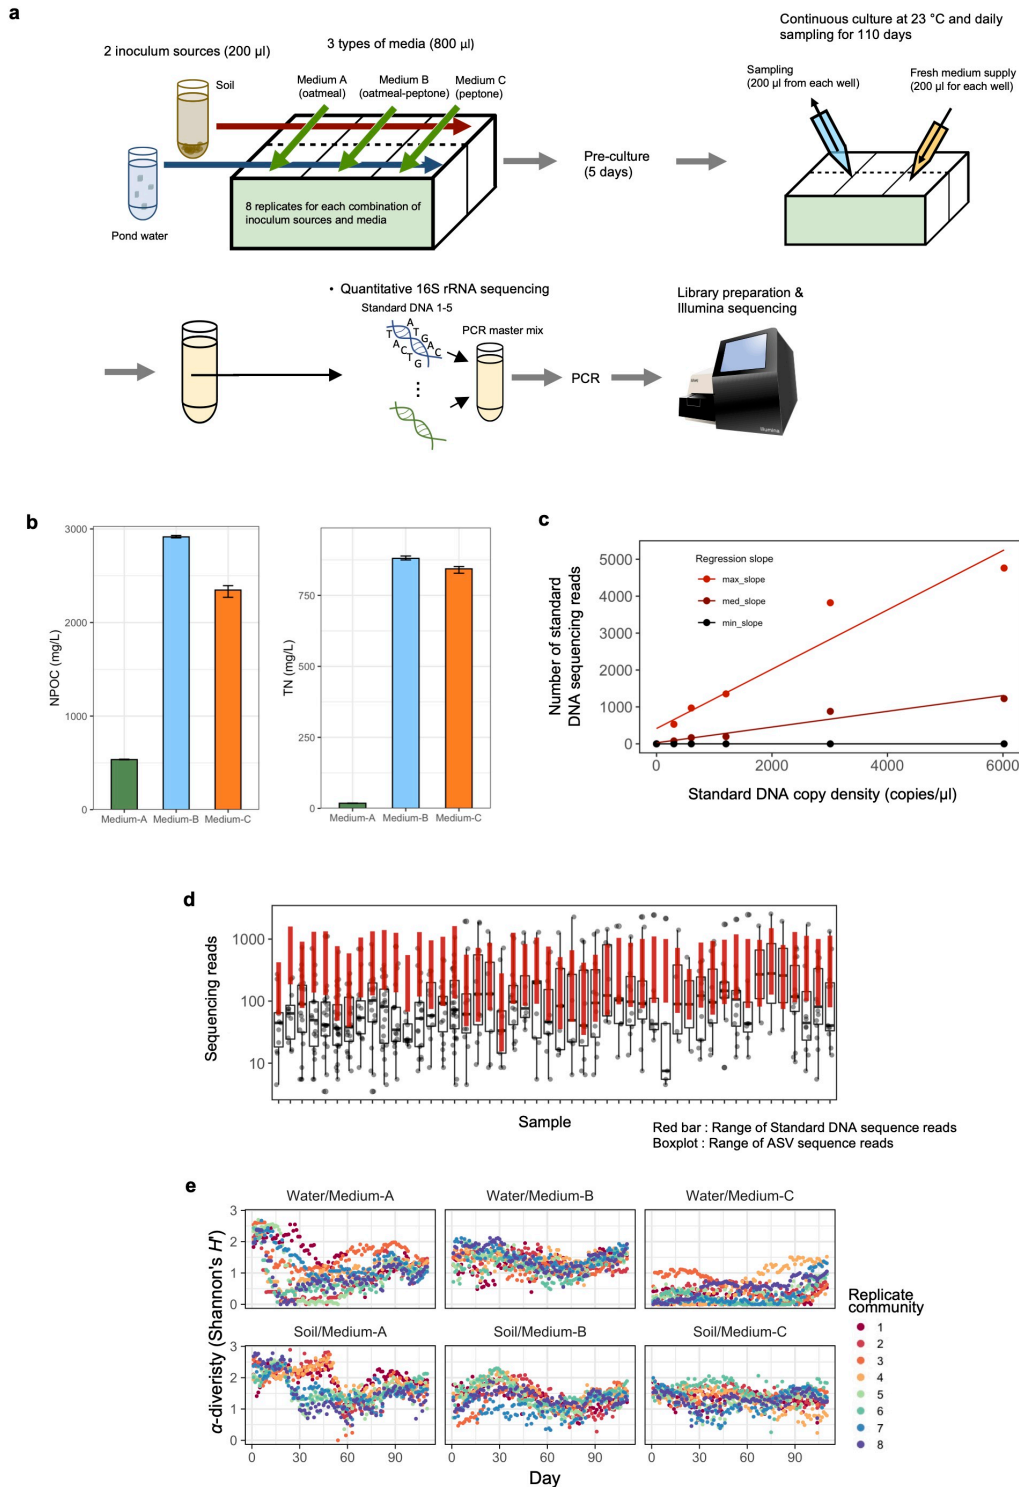

864

865

866

867 **Extended Data Fig. 1 | Experimental setting and microbiome data formats. a, Laboratory**

868 culture system. Source microbiomes from forest soil and pond water were respectively  
869 introduced into three types of media [Medium-A, 0.5% (w/v) milled oatmeal; Medium-B,  
870 0.5% (w/v) milled oatmeal + 0.5% (w/v) peptone; Medium-C, 0.5% (w/v) peptone] with eight  
871 replicates. A fraction of the culture fluid was sampled every 24 hours and equivalent volume  
872 of fresh medium was added to the continual culture system throughout the 110-day  
873 experiment. After DNA extraction, five “standard DNA” variants with different  
874 concentrations were introduced into the amplicon sequencing analysis of the 16S rRNA  
875 region, yielding DNA copy number estimates of each prokaryote ASV in each replicate  
876 sample. **b**, Concentrations of non-purgeable organic carbon (NPOC) and total nitrogen (TN)  
877 in each of the three types of fresh media. The bars represent ranges of triplicate  
878 measurements. **c**, Example of calibration of 16S rRNA copy concentration. In most  
879 microbiome studies, only proportions of respective microbe’s sequencing reads to total  
880 sequencing reads (relative abundance; Extended Data Fig. 3) have been analyzed, while  
881 calibrated abundance information (absolute abundance; Extended Data Fig. 2) allows us to  
882 reconstruct population dynamics (i.e., increase/decrease through time-series) of respective  
883 ASVs in microbiomes. Five standard DNA sequences varying in concentration were added to  
884 PCR master mix solutions to infer relationship between DNA copy concentration and the  
885 number of sequencing reads in each sample. **d**, Calibration of DNA copy concentration with  
886 the standard DNA gradients. The number of sequencing reads of each microbial ASV  
887 (boxplots and circles; black) was compared with that of standard DNA sequences (range of  
888 five standard DNA variants; red) in each sample. **e**,  $\alpha$ -diversity (Shannon’s  $H'$ ) of ASVs  
889 through the time-series.  
890

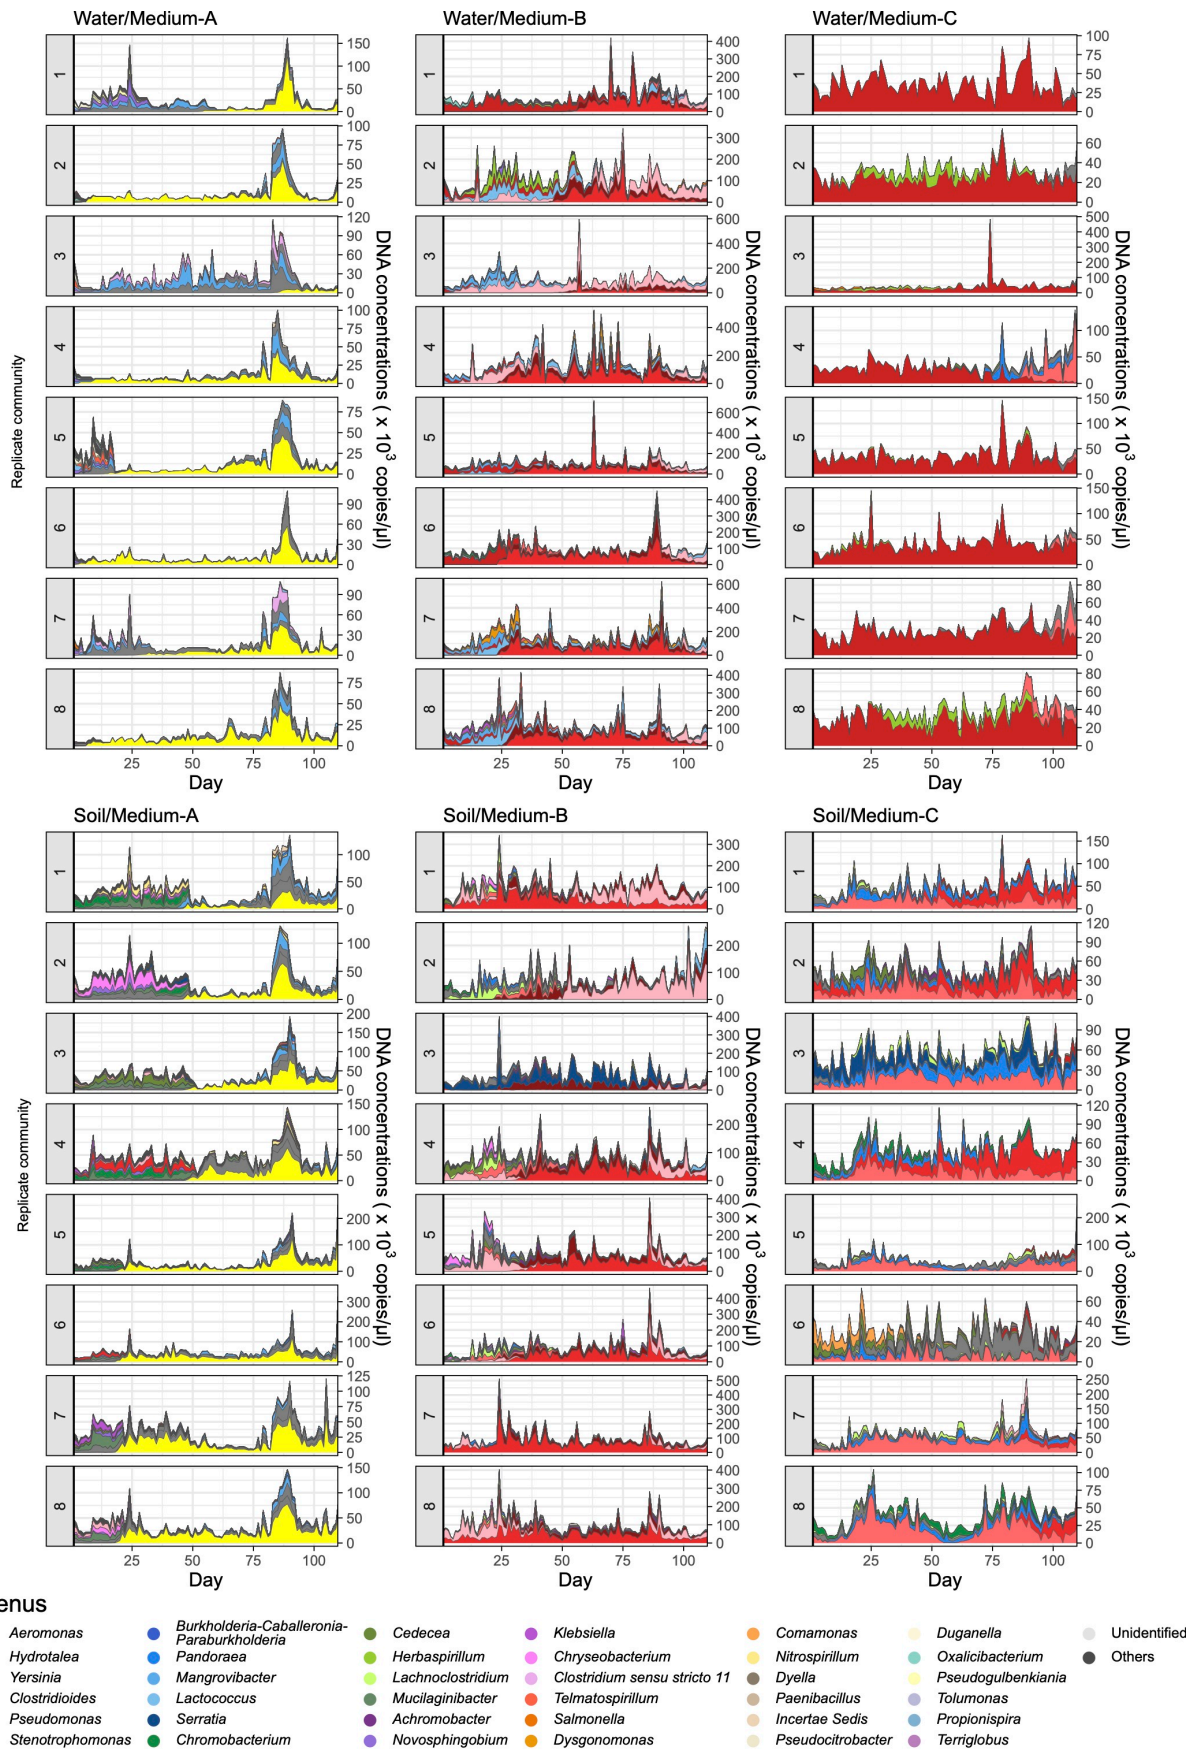

891

892

893 **Extended Data Fig. 2 | Dynamics of absolute abundance.** For each replicate community of  
894 each experimental treatment, the changes of 16S rRNA gene copy concentrations (See  
895 Extended Data Fig. 1) are shown for each genus throughout the time-series. Note that each  
896 genus displayed in this figure can represent multiple microbial ASVs in the original dataset.

897

898

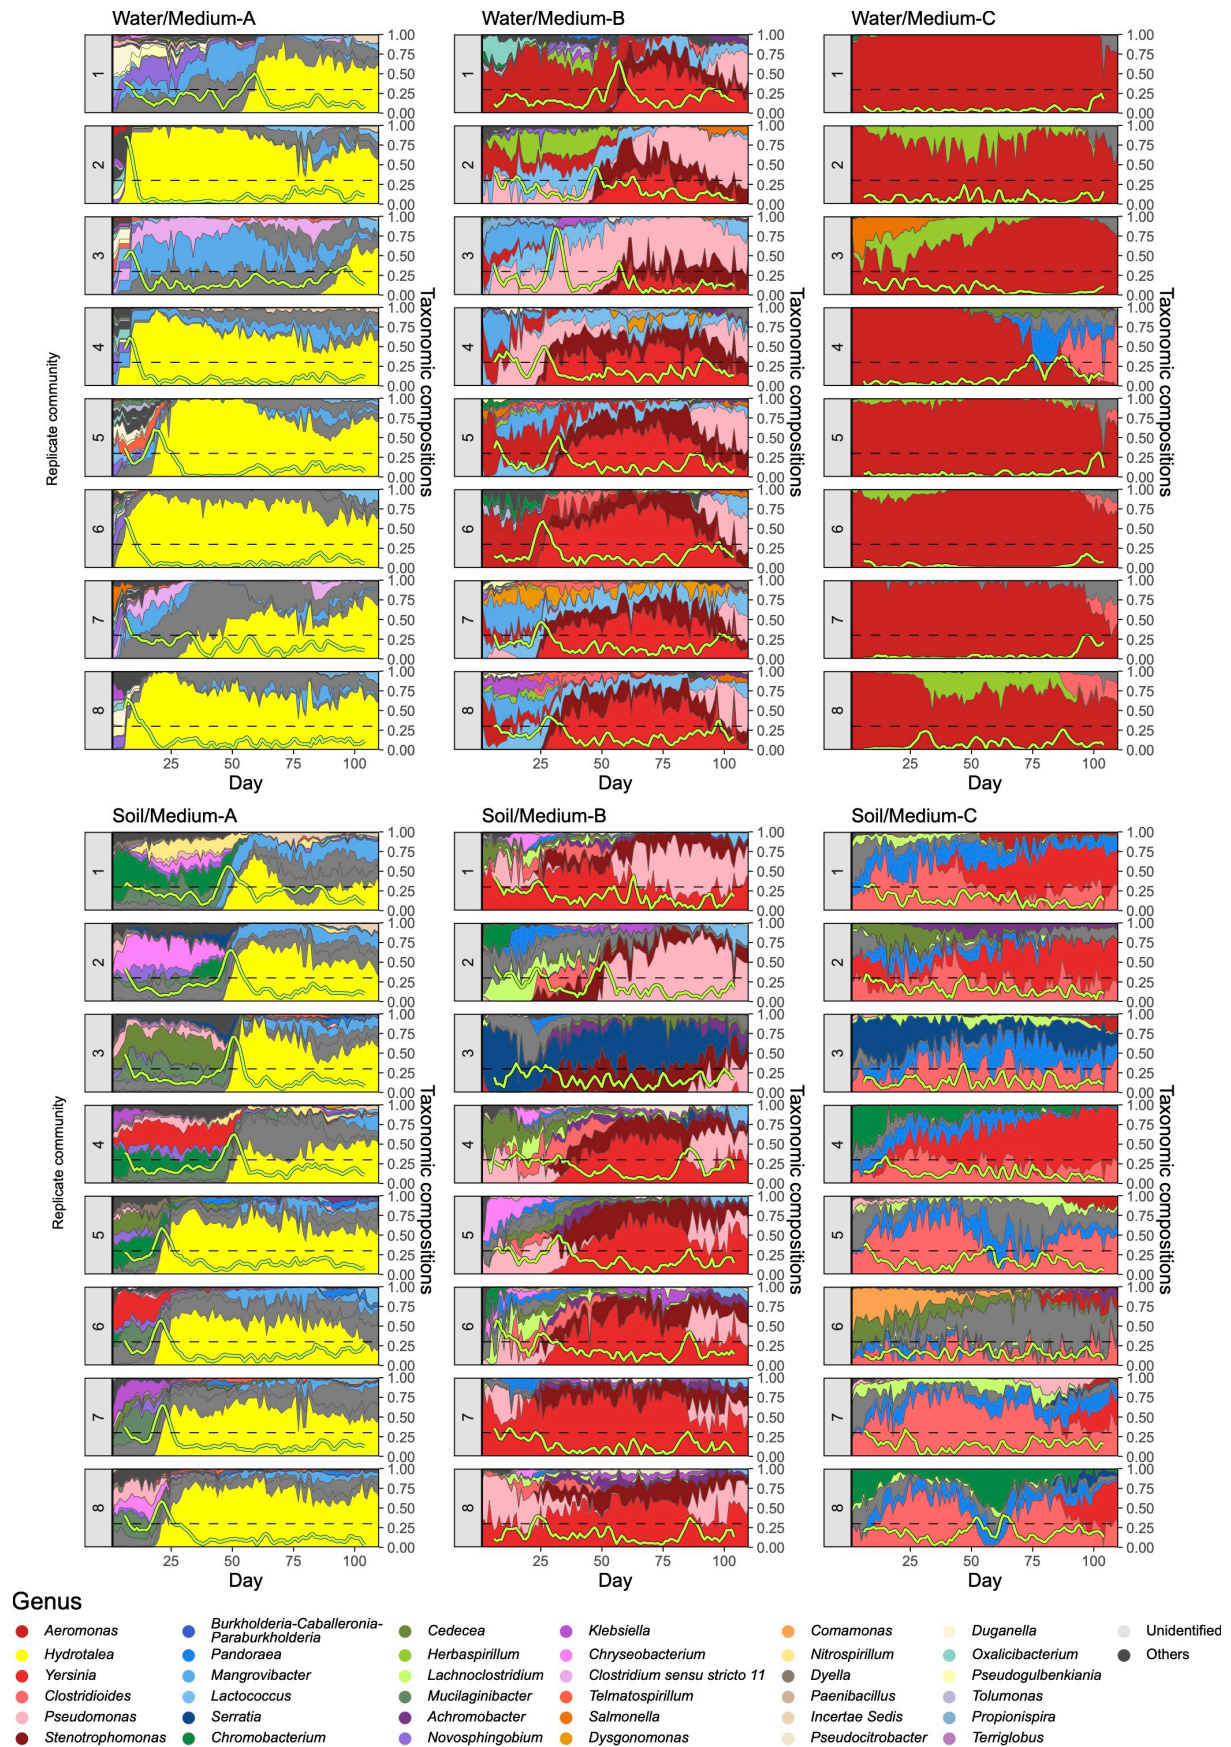

899

900 **Extended Data Fig. 3 | Dynamics of relative abundance.** For each replicate community of

901 each experimental treatment, the changes of the relative abundance of the 16S rRNA region  
902 are shown for each genus throughout the time-series. Note that each genus displayed in this  
903 figure can represent multiple microbial ASVs in the original dataset.

904

905

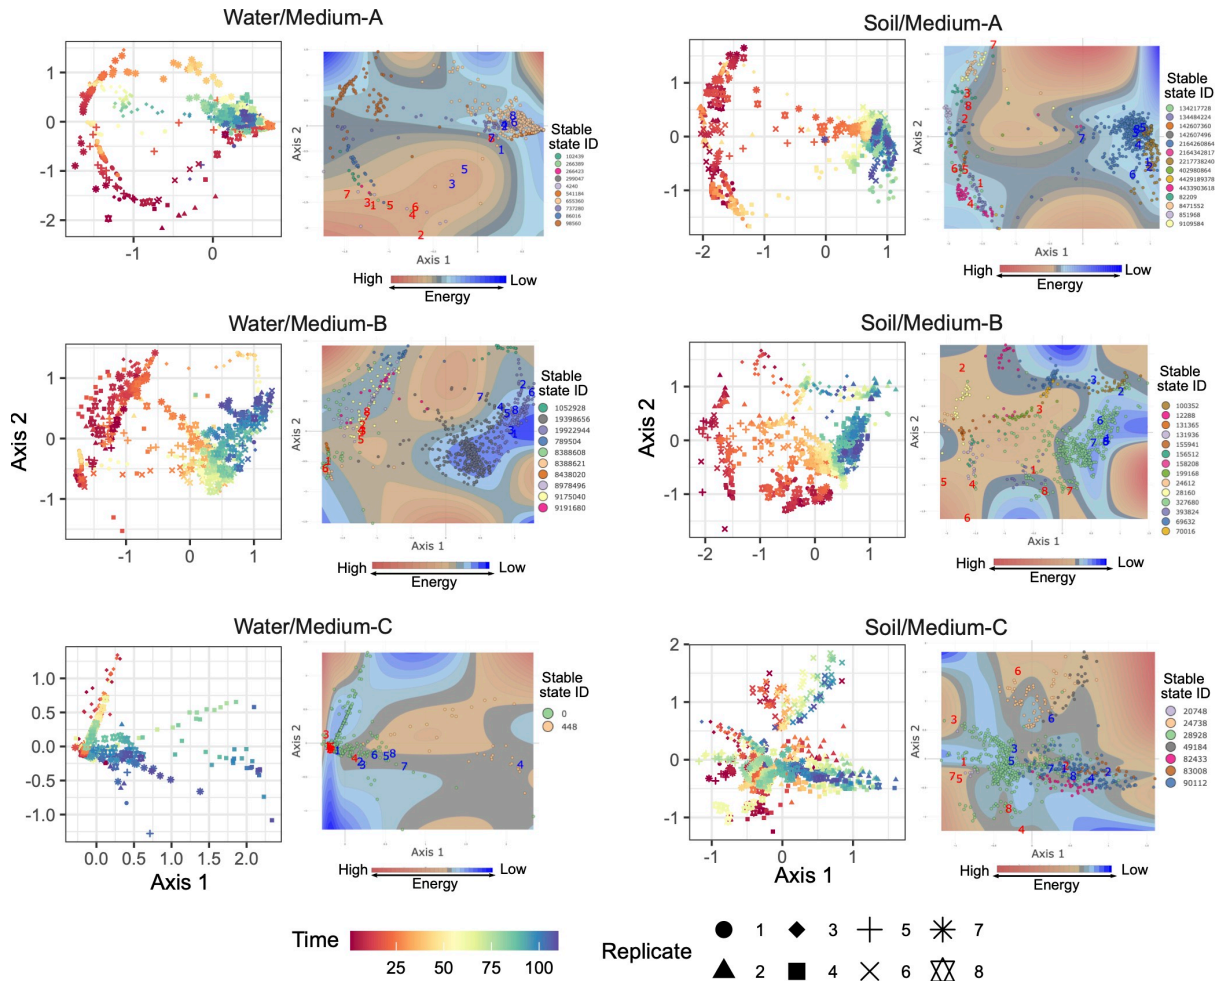

906

907 **Extended Data Fig. 4 | Distribution of stable states on the energy landscapes.** The  
 908 community structure of respective time points on NMDS axes (left) and reconstructed energy  
 909 landscape on the NMDS surface (right) are shown for each experimental treatment.  
 910 Community states (ASV compositions) located at lower-energy regions are inferred to be  
 911 more stable on the energy landscapes. On the energy landscape of each experimental  
 912 treatment, community states (data points) belonging to the basin of the same stable states are  
 913 indicated with the same colors. The shapes of the landscapes were inferred based on a  
 914 smoothing spline method with optimized penalty parameters. Within the energy landscape,  
 915 community states of Day 1 and Day 110 are respectively shown in red and blue numbers  
 916 representing replicate communities.

917

918



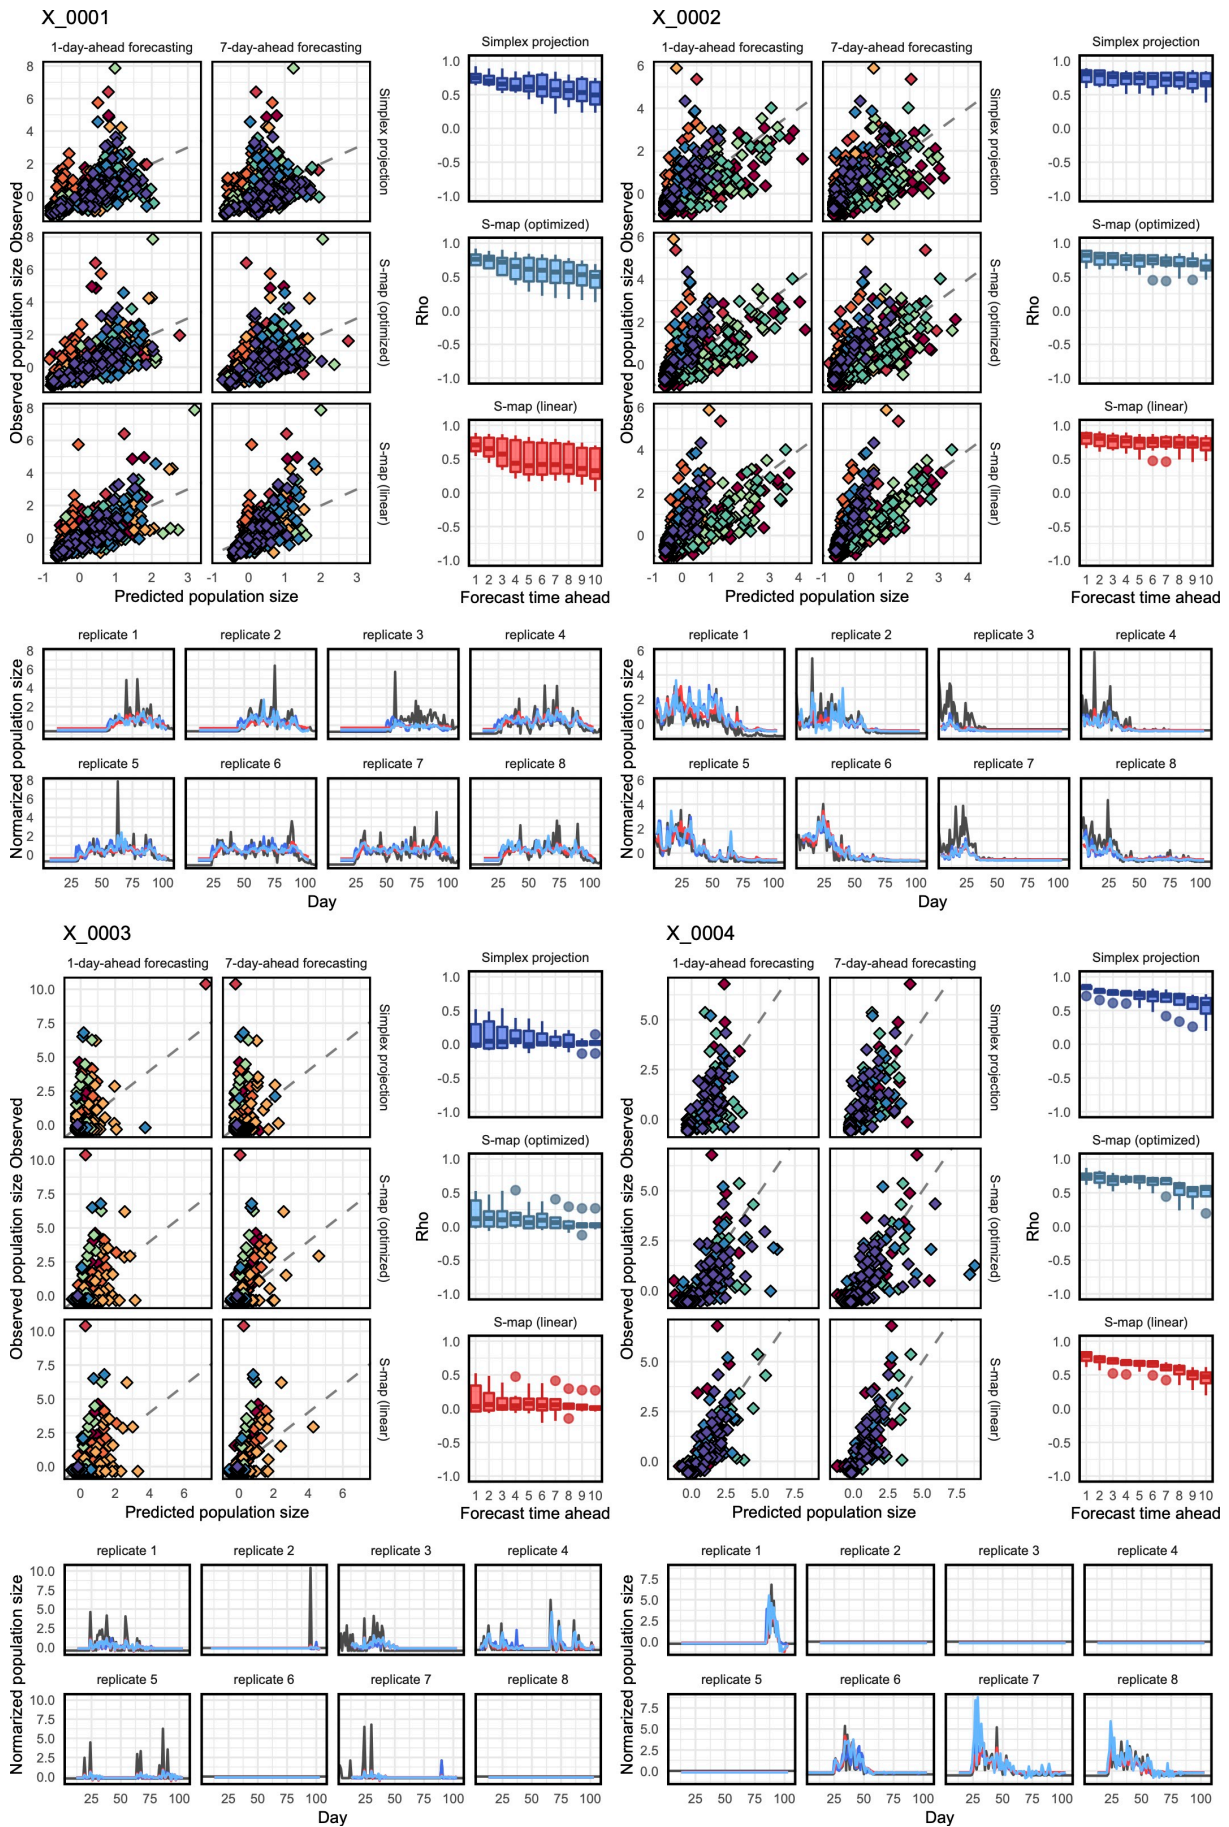

920 **Extended Data Fig. 5 | Examples of population-level forecasting results.** For each  
921 microbial ASV in each experimental treatment, correlations between predicted and observed  
922 abundance through the time-series (one-day-ahead and seven-day-ahead forecasting; top left),  
923 decay of correlation between predicted and observed abundance (top right), and details of the  
924 time-series are shown. The prediction was based on simplex projection, S-map with optimized  
925 nonlinearity parameter (optimized  $\theta$ ), and S-map assuming linearity ( $\theta = 0$ ). For each target  
926 replicate community, the remaining seven replicate communities were used as references. Due  
927 to the large number of ASVs in the dataset, four ASVs in Water/Medium-B treatment are  
928 shown here as examples: the full results are available at the figshare repository (DOI :  
929 [10.6084/m9.figshare.20653440](https://doi.org/10.6084/m9.figshare.20653440)).

930

931

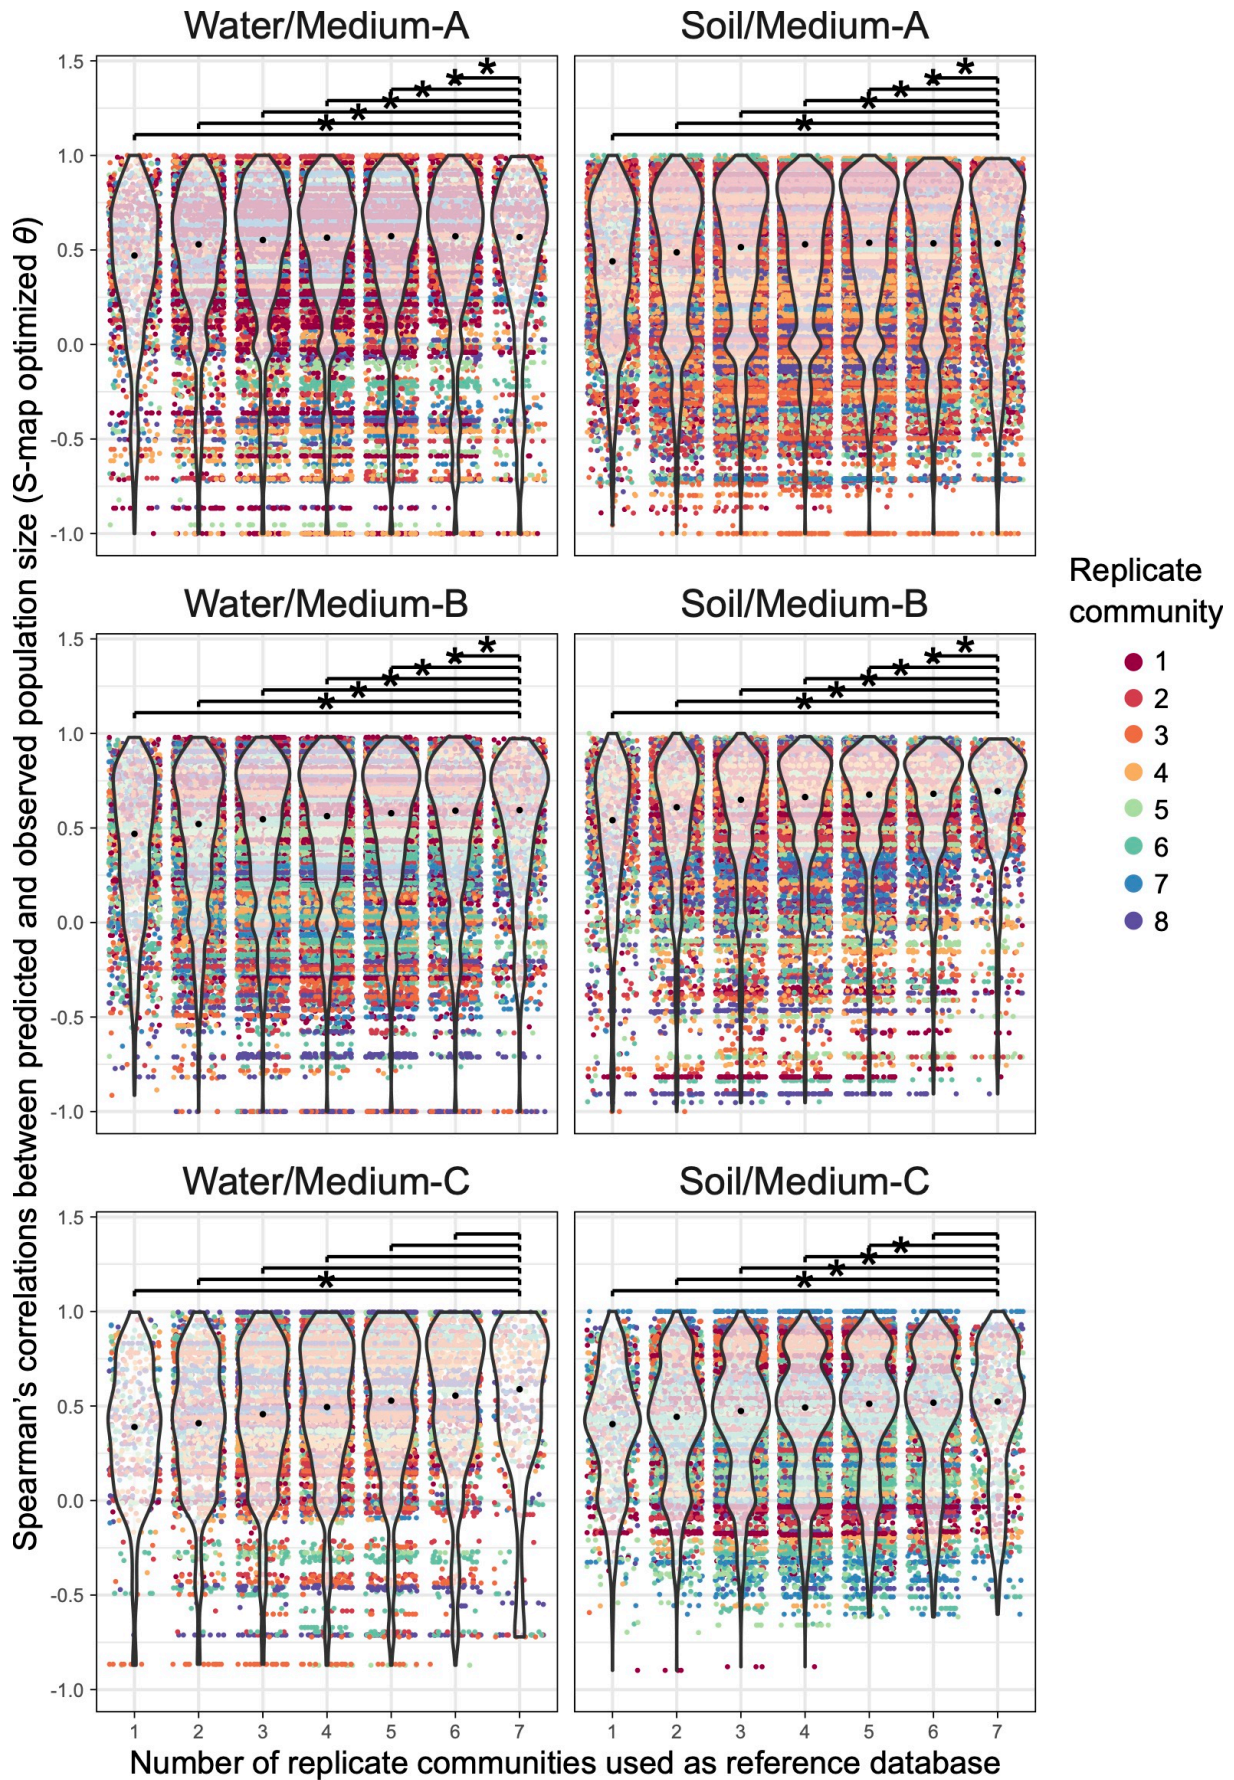

932

933

Extended Data Fig. 6 | Dependence of population-level forecasting results on reference

934 **database size.** The population size of each microbial ASV in a target replicate community  
935 was forecasted with S-map (optimized  $\theta$ ) based on reference databases (Fig. 2a). The  
936 forecasting was performed for each number of reference databases defined on the horizontal  
937 axis. Spearman's correlations between predicted and observed population size (Fig. 2c) were  
938 calculated for each microbial ASV in each replicate community. An asterisk represents  
939 significant differences in forecasting skill (forecasting performance) between different  
940 numbers of reference databases in each experimental replicate: i.e., false discovery rate (FDR)  
941 based on Welch's *t*-tests.

942

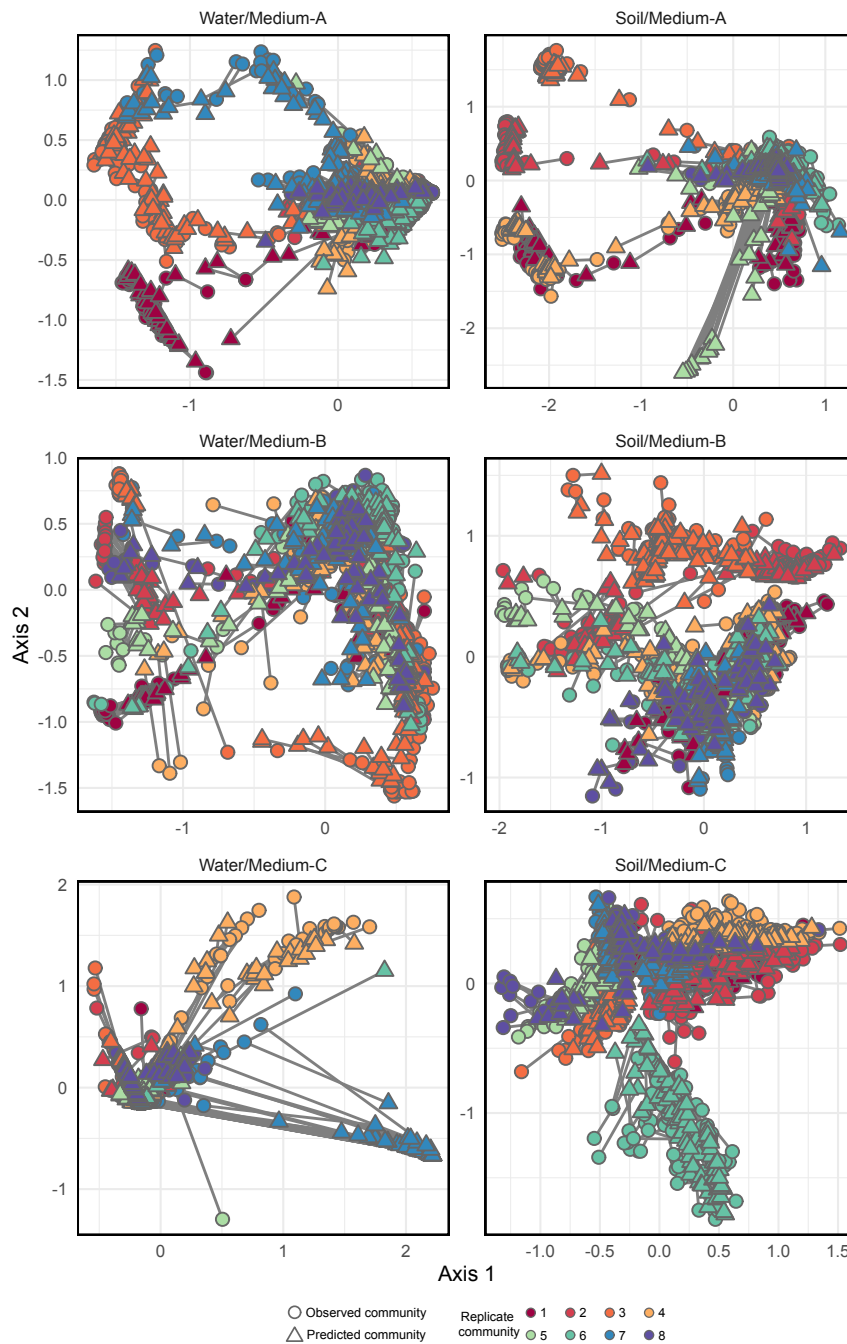

943

944 **Extended Data Fig. 7 | Comparison of predicted and observed community structure.** By  
945 compiling the forecasting results of respective ASVs (Fig. 3; Extended Data Fig. 5),  
946 community compositions are predicted through the time-series. Predicted and observed  
947 community structure is linked for each day on the axes of NMDS (prediction based on S-map  
948 with optimized  $\theta$ ; one-day-ahead forecasting).

949

950

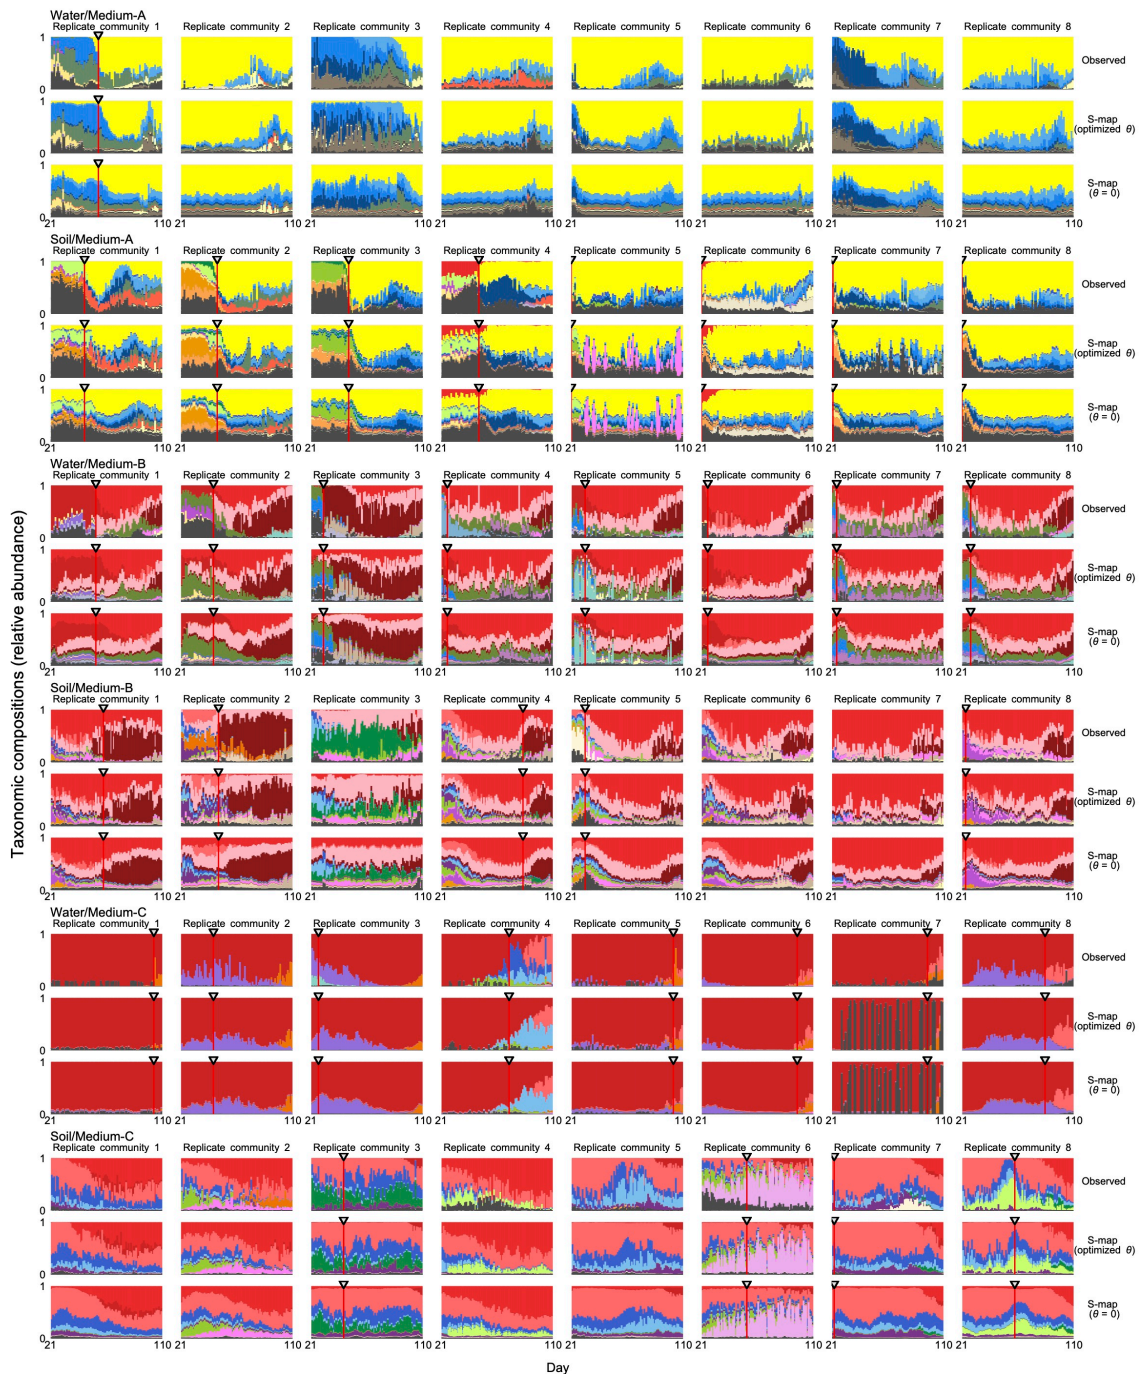

951

952 **Extended Data Fig. 8 | Comparison of nonlinear and linear forecasting approaches.**

953 Throughout the time-series, S-map nonlinear forecasting results are shown with observed  
954 community compositions and linear forecasting results (seven-day-ahead prediction). For the  
955 direct comparison of nonlinear and linear forecasting methods, S-map results with optimized  
956 nonlinearity parameter were compared with results of S-map assuming linear dynamics for all

957 ASVs ( $\theta = 0$ ). Note that forecasting is inapplicable to the beginning of the time-series  
958 depending on embedding dimensions and forecasting time steps. A vertical line represents the  
959 timing of the greatest community compositional change in each replicate community.

960

961

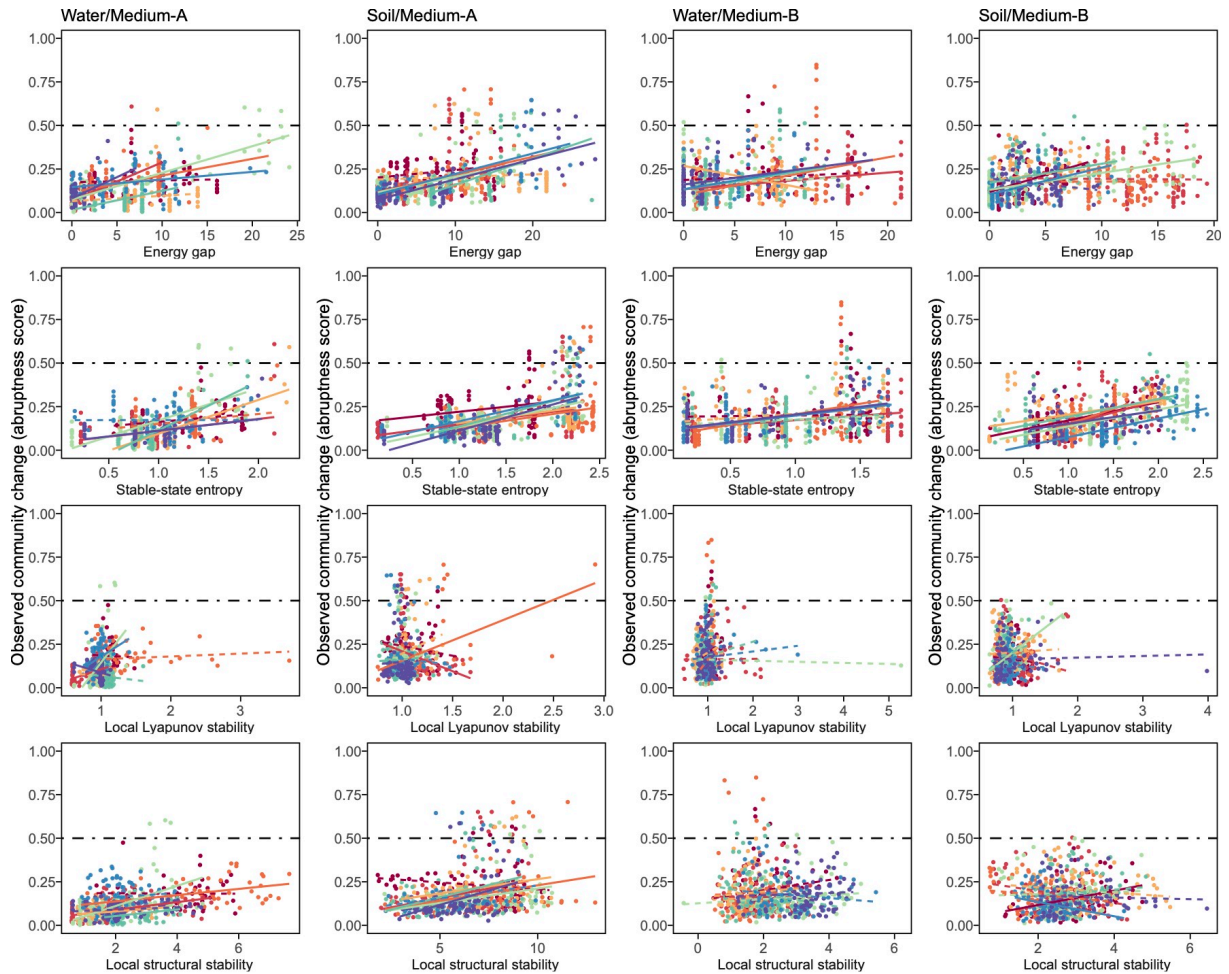

962

963 **Extended Data Fig. 9 | Candidates of signal indices for anticipating abrupt community**  
964 **changes.** Relationships between signal index values and observed community-compositional  
965 changes are shown for seven-day-ahead forecasting. For each index of potential early-warning  
966 signals, Spearman's correlation with the degree of community-compositional changes  
967 (abruptness scores) was examined for each time lag between signal indices and observed  
968 abruptness. The indices examined were the energy gap and stable-state entropy of the energy  
969 landscape analysis and the local Lyapunov stability and local structural stability of empirical  
970 dynamic modeling. Significant/non-significant regressions within respective replicates are  
971 shown with solid/dashed lines for each panel.

972

973



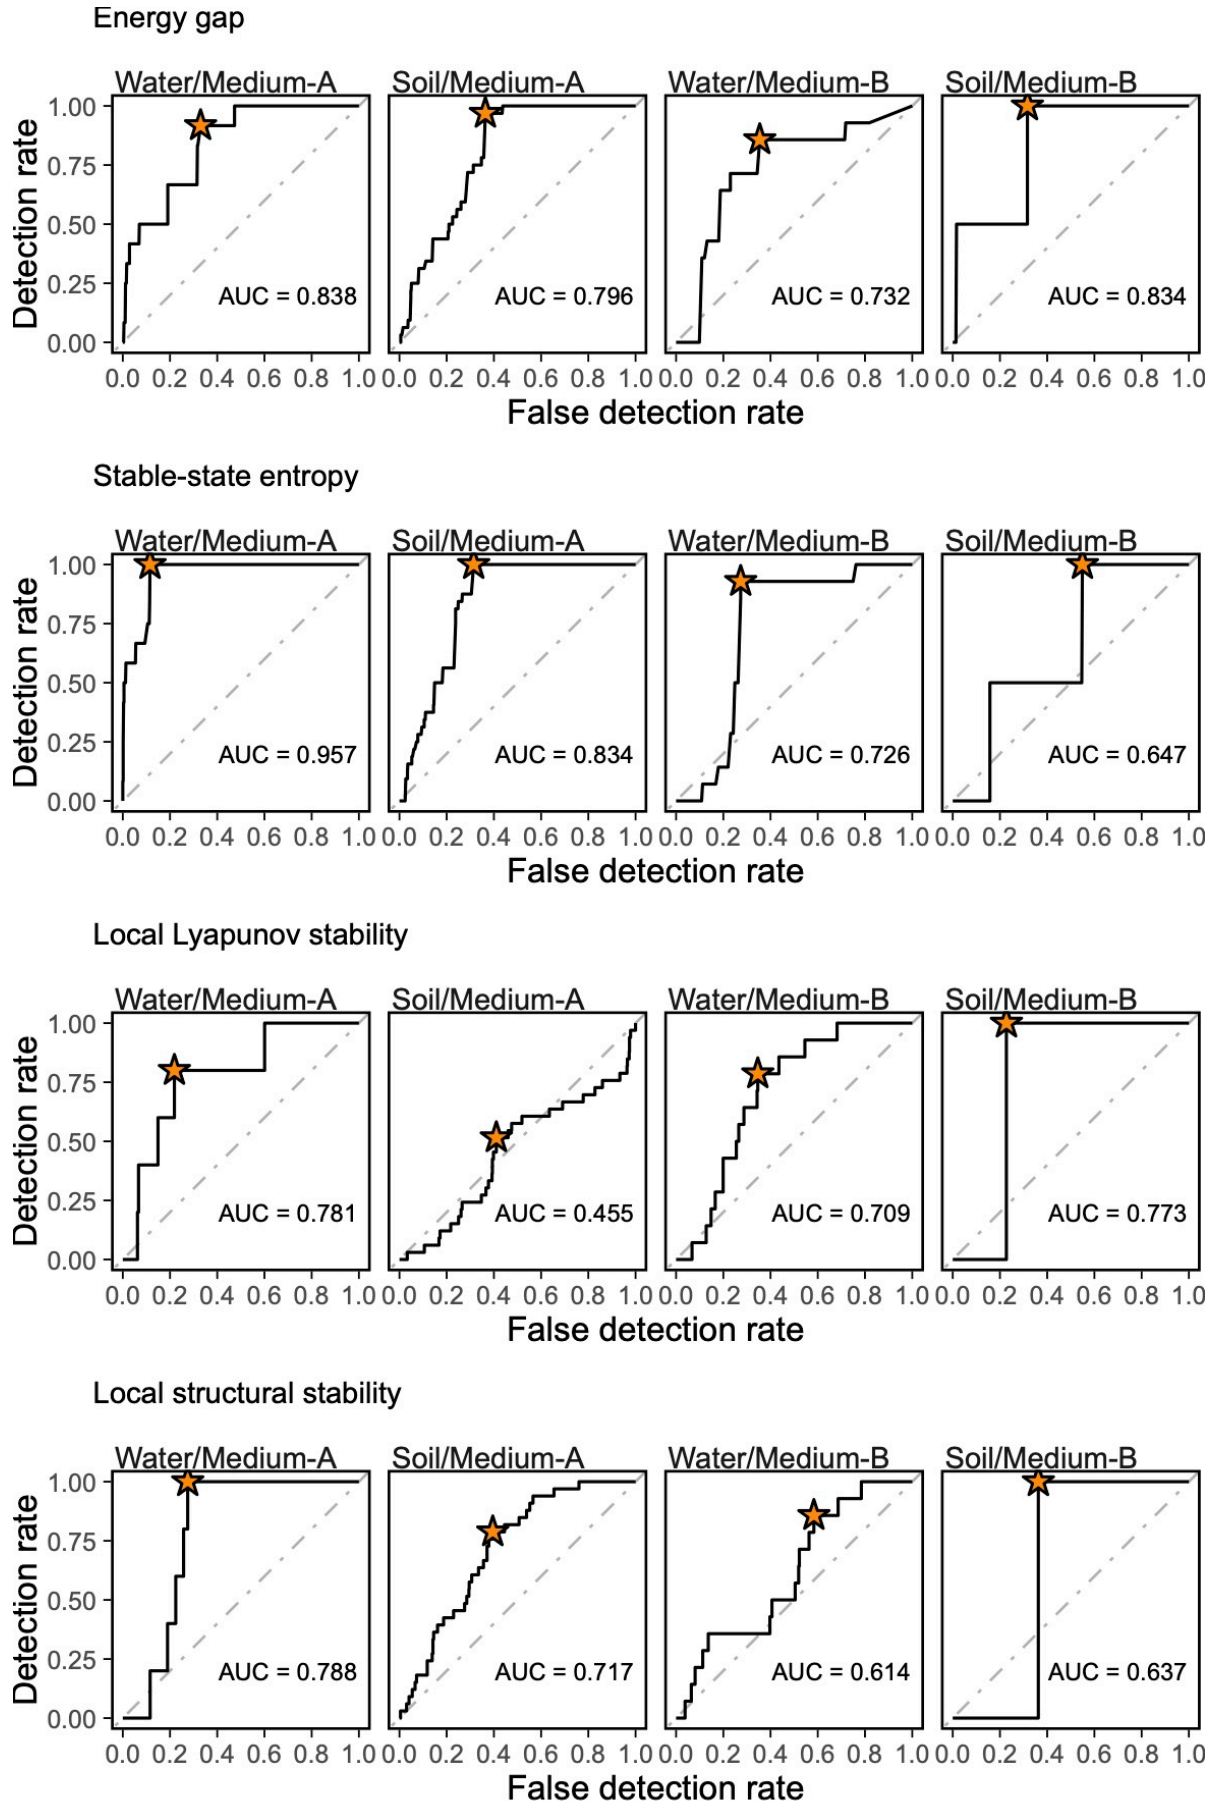

975 **Extended Data Fig. 10 | ROC analysis of diagnostic performance.** On the two-dimensional  
976 surface of detection- and false-detection rates of abrupt community changes (abruptness >  
977 0.5), area under the curve (AUC) and optimal detection rate (asterisk) were calculated (top  
978 panels) for local structural stability or energy gap. Optimal diagnostic threshold of local  
979 structural stability or energy gap for warning abrupt community changes was then obtained  
980 for each treatment based on the Youden index (bottom panels). Note that abrupt community  
981 changes were absent in Medium-C treatments and that the threshold for Soil/Medium-B  
982 treatment was unreliable due to the small number of time points with abruptness > 0.5  
983 (Extended Data Figs. 3 and 9).
